1 **Microglia-secreted TNF- $\alpha$  affects differentiation efficiency and viability of**  
2 **pluripotent stem cell-derived human dopaminergic precursors**

3 Shirley D. Wenker<sup>a</sup>, Victoria Gradaschi<sup>a,1</sup>, Carina Ferrari<sup>a</sup>, Maria Isabel Farias<sup>a</sup>,  
4 Corina Garcia<sup>a</sup>, Juan Beauquis<sup>b</sup>, Xianmin Zeng<sup>c</sup>, Fernando J. Pitossi<sup>a\*</sup>

5

6 <sup>a</sup>Fundación Instituto Leloir - IIBBA-CONICET, Argentina.

7 <sup>b</sup>Instituto de Biología y Medicina Experimental, CONICET, Buenos Aires,  
8 Argentina; Departamento de Química Biológica, Facultad de Ciencias Exactas y  
9 Naturales, Universidad de Buenos Aires, Argentina.

10 <sup>c</sup>RxCell, CA, USA.

11

12 Short title: Functional role of TNF- $\alpha$  on the differentiation and viability of human  
13 dopaminergic neurons

14

15 **Corresponding author:**

16 Fernando J. Pitossi, Ph.D

17 Fundación Instituto Leloir- IIBBA CONICET

18 Av. Patricias Argentinas 435

19 Ciudad Autónoma de Buenos Aires, CP C1405BWE

20 República Argentina.

21 Tel: 54-011-5238-7500

22 E-mail address: [fpitossi@leloir.org.ar](mailto:fpitossi@leloir.org.ar)

23

24        **<sup>1</sup>Present address:** Departamento de Química Biológica. Facultad de  
25        Ciencias Exactas y Naturales, Universidad de Buenos Aires (UBA),  
26        Argentina.

## 28 **ABSTRACT**

29 Parkinson 's Disease is a neurodegenerative disorder characterized by the  
30 progressive loss of dopaminergic cells of the *substantia nigra pars compacta*.  
31 Even though successful transplantation of dopamine-producing cells into the  
32 striatum exhibits favourable effects in animal models and clinical trials;  
33 transplanted cell survival is low. Since every transplant elicits an inflammatory  
34 response which can affect cell survival and differentiation, we aimed to study *in*  
35 *vivo* and *in vitro* the impact of the pro-inflammatory environment on human  
36 dopaminergic precursors. We first observed that transplanted human  
37 dopaminergic precursors into the striatum of immunosuppressed rats elicited an  
38 early and sustained activation of astroglial and microglial cells after 15 days  
39 post-transplant. This long-lasting response was associated with Tumor necrosis  
40 factor alpha expression in microglial cells. *In vitro* conditioned media from  
41 activated BV2 microglial cells increased cell death, decreased Tyrosine  
42 hydroxylase -positive cells and induced morphological alterations on human  
43 neural stem cells-derived dopaminergic precursors at two differentiation stages:  
44 19 days and 28 days. Those effects were ameliorated by inhibition of Tumor  
45 necrosis factor alpha , a cytokine which was previously detected *in vivo* and in  
46 conditioned media from activated BV-2 cells. Our results suggest that a pro-  
47 inflammatory environment is sustained after transplantation under  
48 immunosuppression, providing a window of opportunity to modify this response  
49 to increase transplant survival and differentiation. In addition, our data show that  
50 the microglia-derived pro-inflammatory microenvironment has a negative impact  
51 on survival and differentiation of dopaminergic precursors. Finally, Tumor  
52 necrosis factor alpha plays a key role in these effects, suggesting that this

53 cytokine could be an interesting target to increase the efficacy of human  
54 dopaminergic precursors transplantation in Parkinson 's Disease.

55

56                    **Introduction**

57    Neurological disorders are one of the main causes of disability in the world.  
58    Among these disorders, Parkinson's disease (PD), affects the second largest  
59    group of people and has the highest growth in incidence. From 1990 to 2015,  
60    the prevalence of PD and, therefore, disability and cause of death doubled, with  
61    a prevalence of 98 cases of PD per 100,000 individuals, representing a 15.7%  
62    increase (1).

63    PD is a neurodegenerative disorder, whose cardinal pathology is the loss of  
64    dopaminergic (DA) neurons in the *substantia nigra pars compacta*. Current  
65    treatments for PD provide symptomatic relief but have side effects in the long  
66    term and do not halt disease progression or regenerate DA cell loss (2).

67    Cell replacement therapy has been proposed as an alternative strategy due to  
68    the fact that motor symptoms of PD are caused by the degeneration of a  
69    specific cell type, DA neurons. Therefore, grafts of DA precursors (DAP) could  
70    have the potential to replace the function of DAN loss and thus reduce the  
71    associated motor symptoms. Pre-clinical and clinical trials have provided proof  
72    of concept that the transplantation of DA neuroblasts in the striatum can  
73    alleviate parkinsonian symptoms (3,4). DA neuroblasts and not mature DA  
74    neurons are used since the transplanted cells need to engraft in the host  
75    parenchyma in order to survive. Although the results from clinical trials have  
76    demonstrated that this approach is safe, its efficacy was variable and several  
77    undesirable side effects such as graft-induced dyskinesia were reported. Thus,  
78    standardization of several factors is crucial to optimize the efficiency of the  
79    treatment and try to prevent unwanted effects (3,5). One important factor for the  
80    development of an effective therapy of cell replacement is the host-primary

81 response related to the graft. The microenvironment generated by the host  
82 could have dramatic effects on the survival, differentiation and proliferation of  
83 the transplanted cells. In this context, microglia activation affects dramatically  
84 the host environment after a mechanical intervention to the central nervous  
85 system (CNS). Cellular transplantation in the CNS not only includes such a  
86 mechanical injury but also provides a plethora of inflammatory and immune  
87 stimuli to the transplantation site (6). Adaptive immune responses are usually  
88 prevented by immunosuppression treatments. However, innate immune  
89 responses should remain active after transplantation but scarce information is  
90 available on its characteristics, duration and functional effects on the transplant.  
91 In particular, the possible effects of microglia, the main effectors of the innate  
92 immune response in the brain, on the fate of the transplanted cells are poorly  
93 described. Microglial activation produces several pro-inflammatory factors with  
94 neurotoxic effects (i.e., Tumor necrosis factor alpha (TNF- $\alpha$ ), Interleukin (IL)-1,  
95 IFN-gamma, Nitric oxide, and reactive oxygen species) that could compromise  
96 the viability and/or differentiation of DA precursors (7). Because grafting to the  
97 CNS inevitably causes activation of host's microglia, understanding its  
98 functional effects on the viability and differentiation of DA precursors is  
99 important in order to detect potential molecular targets to improve the efficacy of  
100 cell therapy.

101 In this work, we found that sustained and increased microglial and astroglial  
102 response were observed 15 days post-transplantation even in the presence of a  
103 constant immunosuppressive treatment. On the contrary, the transplanted cells  
104 elicited only a marginal and transient infiltration of neutrophils. Then, we  
105 observed that *in vitro*, activated microglial-derived conditioned media diminished

106 human DAp survival, differentiation and affected cell morphology. These effects  
107 were blocked by inhibiting TNF- $\alpha$  in the culture.

108

## 109 **Materials and methods**

### 110 **Reagents**

111 All chemicals used were of analytical grade. D-MEM,  $\alpha$ MEM; GMEM,  
112 Neurobasal, B27, Geltrex, Acutase, penicillin/streptomycin; NEAA;  $\beta$ -  
113 mercaptoethanol and KSR were obtained from Gibco. GDNF and BDNF were  
114 from Peprotech. L-glutamine; Na pyruvate; dimethylsulfoxide; Mitomycin C;  
115 lipopolysaccharide and p-formaldehyde (PFA) were obtained from Sigma-  
116 Aldrich. TNF- $\alpha$  -ELISA Kit was obtained from BD. Triton X-100 and Tween 20  
117 were from Merck. Fetal bovine serum (FBS), and were obtained from  
118 Internegocios SA (Argentina). Cyclosporine was from Novartis.

119

### 120 **Cell cultures**

#### 121 **PA6 cells**

122 Mouse stromal cell line PA6 (RIKEN BRC) were maintained and propagated  
123  $\alpha$ MEM, supplemented with 10% FBS and antibiotics (100 U/ml penicillin, 100  
124  $\mu$ g/ml streptomycin).

125

#### 126 **Human Neural Stem Cells (hNSCs)**

127 hNSCs-H14, kindly gifted by Dr Xianmin Zeng were propagated using  
128 Neurobasal medium supplemented with B27, 2 mM NEAA, 20 ng/mL of bFGF  
129 and antibiotics (100 U/ml penicillin, 100  $\mu$ g/ml streptomycin) on Geltrex-coated

130 dishes. Quality control for hNSCs populations were analyzed by  
131 immunofluorescences for Nestin and SOX-1.

132

### 133 **Dopaminergic differentiation**

134 Generation of PA6 conditioned media (PA6-CM): PA6 cells were cultured,  
135 grown to 80% confluence, and then treated with Mitomycin C (0.01mg/ml; 2 hs).

136 After 5 washes with PBS, PA6 cells were incubated with fresh PA6 culture  
137 medium for 16 hs. Then, PA6 maintenance culture medium was replaced with  
138 ESD medium (GMEM with 10% KSR, 1× NEAA, 1× Na pyruvate, and 1× β-  
139 mercaptoethanol). PA6-CM was collected every 24 h during 1 week (8).

140 DA differentiation was initiated by culturing hNSCs with PA6-CM on culture  
141 dishes coated with poly-L-ornithine (20 µg/mL) and laminin (10 µg/mL). After 14  
142 days of differentiation, DA precursors (DA14) (150000 live cells/cm<sup>2</sup>) were  
143 transferred to 24-well plates. Cells were cultured in PA6-CM with BDNF (20  
144 ng/mL) and GDNF (20 ng/mL) until day 28 (DA28) (8).

145 The different states of maturation from hNSCs cultures to dopaminergic  
146 differentiation were analyzed macroscopically and by immunofluorescent  
147 staining of differentiation markers such as TH, Foxa-2, TUJ1, GFAP. The  
148 characterization was carried out at two stages of the differentiation protocol: day  
149 14 (DA14) and day 28 (DA28) (9).

150 *In vitro* treatments were carried out after 24 hs of incubation of DA14 cultures.

151

### 152 **BV2 microglial cells**

153 Mouse BV2 microglial cell line was provided by Dr. Guillermo Giambartolomei  
154 (Hospital de Clínicas, Buenos Aires, Argentina). Cell line was maintained in 100



155 mm plastic tissue-culture dishes (GBO) containing D-MEM supplemented with 2  
156 mM L-glutamine, antibiotics (100 U/ml penicillin, 100 µg/ml streptomycin), 10%  
157 FBS (10).

158

159 All cultures were developed at 37°C with 5% CO<sub>2</sub> and 100% humidity. Media  
160 were replaced every 2 days and cells were split before they reached  
161 confluence.

162

### 163 **Animals**

164 Adult male Wistar rats (Jackson Laboratory, Bar Harbor, ME, USA), bred for  
165 several generations in the Leloir Institute Foundation facility, were used in all of  
166 the experiments. The animals were housed under controlled temperature  
167 conditions (22±2°C), with food and water provided ad libitum and a 12:12  
168 dark:light cycle with lights on at 08.00 h. All experimental procedures involving  
169 animals and their care were conducted in full compliance with NIH and internal  
170 Institute Foundation Leloir guidelines and were approved by the Institutional  
171 Review Board “Cuidado y Uso de Animales de Laboratorio (CICUAL-FIL)”. All of  
172 the animal groups were periodically monitored, indicating that the welfare of the  
173 animals was consistent with the standards of the ethical guidelines for animals.

174

### 175 **Cell transplantation**

176 For stereotaxic injections, the animals were anaesthetized with ketamine  
177 chlorhydrate (80mg/kg) and xylazine (8mg/kg). Intrastratial stereotaxic  
178 transplantation was conducted on cyclosporine A-immunosuppressed male rats  
179 (age: 8 weeks). The stereotaxic coordinates were: bregma +1.0 mm; lateral

180 +3.0 mm; ventral -5 and -4.5 mm (11). After confirmation of the viability of the  
181 hDAp with Trypan blue vital stain, the concentration of the suspension was  
182 adjusted to 125000 cell/ $\mu$ L. About 250000 human DAp (viability: 81%) derived  
183 from hNSCs-H14 were transplanted into the left striatum by using a Hamilton  
184 syringe (12). 2  $\mu$ l of the cell suspension was inoculated. The injection flow was  
185 0.5 $\mu$ l/min. After injection, the cannula was held in place for 5 min, before being  
186 slowly retracted. The experimental animals did not show signs of ongoing  
187 disease. They presented with normal fur, activity, movement, and food  
188 consumption.

189 Cyclosporine A (Novartis, 15 mg/kg) was administrated daily (Intraperitoneal  
190 injection) until the end of the experiment, starting 2 days before cell  
191 transplantation (13).

192 Host primary response related to the graft were analysed by histological and  
193 immunofluorescences techniques at different time points (1, 7, 15 and 28 days.  
194  $n=5$  rats per group). In this case, the male rat was the experimental unit.

195 An aliquot of hDAp obtained from transplantation were cultured for terminal  
196 differentiation *in vitro*. At DA28,  $17\pm 1\%$  of Tyrosine hydroxylase (TH)-positive  
197 cells were detected by immunofluorescence.

198

### 199 ***In vitro* experimental treatments**

200 A) Microglia activation: BV2 cells were seeded in 6-wells plate (75000  
201 cells/cm<sup>2</sup>). After 24 hs, cell cultures were treated with lipopolysaccharide (LPS)  
202 for 24 h according to Dai and colleagues (10).

203 B) DA precursors acute exposure to conditioned media from microglial cells: DA  
204 precursors had been previously plated for 24 h, as DA14, in 0.5 ml of PA6

205 medium containing differentiation factors. Activation of BV2 microglial cells (24  
206 h) were carried out as explained before. After centrifugation (2000 rpm, 10  
207 minutes) 0.6 ml cell-free supernatants (CM, conditioned media) from basal and  
208 activated microglial cultures were transferred to wells containing DA precursors  
209 (DA15). After 4 days of DA precursor incubation with conditioned medium from  
210 BV2 cells (CM-BV2), evaluation of cell survival and differentiation was  
211 performed.

212 In TNF- $\alpha$  neutralization experiments etanercept (Enbrel, Pfizer; 100 ng/mL)  
213 (14), an inhibitor of both soluble and transmembrane forms of TNF, was added  
214 to CM-BV2 as co-treatment.

215

#### 216 **Measurement of nitric oxide**

217 Nitric oxide (NO) production was determined by measuring the accumulation of  
218 nitrite, the stable metabolite of NO, in culture medium. Isolated supernatants  
219 collected from microglial cell cultures exposed to LPS for the indicated period  
220 were mixed with equal volumes of the Griess reagent (1% sulfanilamide, 0,1%  
221 naphthylethylenediamine-dihydrochloride, and 2% phosphoric acid) and  
222 incubated at 25°C for 10min. Absorbance at 540 nm was measured in a  
223 microplate reader (15).

224

#### 225 **Cytokine quantification**

226 TNF- $\alpha$  was measured by enzyme-linked immunosorbent assay (ELISA) in  
227 supernatants obtained as described above for NO measurement. ELISA test  
228 was performed according to the manufacturer's instructions of the kit. In each

229 trial, samples were analyzed in duplicate against standards of known  
230 concentration.

231

## 232 **Histology**

233 The animals were deeply anaesthetized as previously described (16) and were  
234 transcardially perfused with heparinized saline, followed by ice-cold 4% PFA in  
235 phosphate buffer (PB) (0,1M; pH 7,2). Brains were dissected and placed in the  
236 same fixative overnight at 4°C and cryoprotected in 30% sucrose 0.1M PB  
237 solution. Then, the brains were frozen in isopentane and cut using a cryostat  
238 into 40-µm serial coronal sections through the left prefrontal cortex. Sections  
239 were mounted on gelatine coated slides and stained with Cresyl Violet to  
240 assess the general nervous tissue integrity, neutrophils cell counts and  
241 inflammation. For immunohistochemistry, sections were stored in cryoprotective  
242 solution at -20°C until needed.

243

## 244 **Immunofluorescence**

245 Free-floating sections were rinsed in 0.1% Triton in 0,1M PB. After washes with  
246 PB-T, samples were blocked in 1% donkey serum for 45 min, and then  
247 incubated overnight at 4°C with primary antibodies diluted in blocking solution.  
248 The list of antibodies is provided in Table 1. After three 10-minute washes with  
249 0.1 mol/L PB, the sections were incubated with indocarbocyanine (Cy3) or  
250 cyanine Cy2 (Cy2)- conjugated donkey anti-rabbit or anti-mouse antibody,  
251 respectively (1:500; Jackson ImmunoResearch) for 2 h at room temperature,  
252 rinsed in PB and mounted in Mowiol (Calbiochem). Digital images were

253 obtained in a Zeiss LSM 510 laser scanning confocal microscope equipped with  
254 a krypton-argon laser.

255

256 **Table 1: list of antibodies used**

| <b>Antibody</b>                 | <b>Trademark</b> | <b>Catalogue numbers</b> |
|---------------------------------|------------------|--------------------------|
| Anti-GFAP                       | DAKO             | Z0334                    |
| Anti-MHCII                      | Serotec          | MCA46G                   |
| Anti-ED1                        | Serotec          | MAC341R                  |
| Anti-SOX1                       | R&D system       | AF3369                   |
| Anti-Nestin                     | Abcam            | ab22035                  |
| Anti-TUJ1                       | Promega          | G712A                    |
| Anti-MAP-2                      | Cell Signaling   | 9043S                    |
| Anti-Foxa-2                     | Abcam            | ab117542                 |
| Anti- Tyrosine hydroxylase (TH) | Pell-Frezze      | P40101                   |
| Anti-Caspase 3 active (CA3)     | Neuromics        | RA15046                  |
| Anti-NfκB                       | SCBT             | sc-372                   |
| Anti-hNCAM                      | SCBT             | sc-33686                 |
| Anti-TNF-α                      | SCBT             | sc-1351                  |

257

258 DA cell cultures: samples were fixed with PFA in 4% w/v in PBS, with incubation  
259 at room temperature (20 min). After three washes with PBS-T, samples were  
260 blocked with 1% donkey serum in PBS-T (1h at room temperature), and then  
261 incubated with primary antibody (Table 1), for 16hs at 4°C. After PBS-T washes,  
262 incubation with the secondary antibody (1:1000; Jackson ImmunoResearch)

263 were performed proceed for 2 hrs at room temperature in the dark. At the end,  
264 excess antibody was removed with three new washes with PBS, nuclear  
265 staining will be performed with Hoechst 33258 dye (1:1000 dilution in PBS).  
266 After washing thrice with PBS, samples were mounted in Mowiol (Calbiochem).

267

268 BV-2 cells: After fixation with methanol, NFκB immunocytochemistry was  
269 performed on BV2 cells to determine nuclear translocation as a proxy for cell  
270 activation. Cells attached to coverslips were permeabilized with 0.5% triton X-  
271 100 in PBS and unspecific binding sites were blocked with 1% BSA in PBS.  
272 Cells were incubated with primary antibody against NFκB and then with Alexa  
273 Fluor (488/596; Thermo-Fisher) labeled secondary antibodies. Nuclei were  
274 visualized Hoechst 33258 dye (1:1000). After washing thrice with PBS, samples  
275 were mounted with Mowiol (Calbiochem).

276

### 277 **Fluorescence microscopy: Hoechst nuclear staining of apoptotic cells**

278 DA cell cultures were developed on slide covers plated in in 24-wells plate. After  
279 treatments, cells were fixed with PFA 4% w/v in PBS for 20min at 4 °C, exposed  
280 to Hoechst 33258 dye in PBS for 30 min at room temperature, and washed  
281 thrice with PBS. Finally, samples were mounted and fluorescent nuclei with  
282 apoptotic characteristics were detected and analyzed by immunofluorescence  
283 microscopy. Apoptotic cells were identified by morphology and nuclear  
284 fluorescence intensity. The condensed chromatin within apoptotic cells stains  
285 particularly heavily showing blue fluorescence. In addition, little apoptotic bodies  
286 released from nuclei are also detected because of their brilliant blue color.  
287 Differential cell count was performed by evaluating at least 1000 cells (15).

288 Images were captured with Zeiss Axio Observer and Zeiss LSM 510 laser  
289 scanning confocal microscope equipped with a krypton-argon laser.

290

### 291 **Image analysis**

292 Polymorphonuclear-neutrophil (PMN) cells were identified by their nuclear  
293 morphology appearance in 40- $\mu$ m thick cresyl violet-stained sections. For MHC  
294 II-positive and GFAP-positive cell quantification, approximately 10 fields were  
295 quantified for each animal using the Zeiss Image J software. The total number  
296 of positive cells was normalized to the total area counted for each sample (16).

297 Twenty images were obtained by random sample and the analysis was  
298 performed using the Image J software. Using the image overlay and cell count  
299 plugings, the total number of cells per field and the number of cells positive for  
300 the corresponding labeling were counted (example: TH, TUJ1, Foxa-2). In this  
301 way, the percentage of positive cells will be obtained in relation to the number of  
302 nuclei counted. At least 1000 total cells were counted.

303

### 304 **Differentiation analysis**

305 DA precursors were seeded and after 24 h-incubation, DA15 were exposed to  
306 CM-BV2. Cell morphology was observed under phase-contrast in an inverted  
307 microscope at 200x magnification and photographed by using a Nikon DS-L3  
308 digital camera. Cell differentiation was determined in independent experiments  
309 by counting differentiated cells based on morphological criteria (17) and  
310 expressed as percentage of total cells (at least 500 cells).

311 For neurite outgrowth analysis from TH+ cells derived from DA differentiation  
312 were performed at DA19 and DA28 stages. Multiple independent images were

313 taken from immunofluorescence against TH at 400x magnification. At least 10  
314 neurites per field were selected for neurite outgrowth measurement and means  
315 of neurite length were calculated for each assay. This neurite tracing technique  
316 was implemented in the form of a plugin (NeuronJ) for ImageJ, the computer-  
317 platform independent public domain image analysis program inspired by NIH-  
318 Image (18).

319

## 320 **Statistical analysis**

321 Statistical analysis was performed using GraphPad Prism, version 6.00 for  
322 Windows (GraphPad Software, San Diego, CA, USA). Results were expressed  
323 as mean and standard error (SEM) of n independent trials (at least 3) indicated  
324 in each figure. Statistical significance was calculated using two-tailed Student's t  
325 test or ANOVA followed by *post hoc* multiple comparison test as indicated.  
326 When corresponding statistical differences between groups were assessed by  
327 means of the Mann-Whitney test or the Kruskal-Wallis One Way Analysis of  
328 Variance. At least differences with  $P < 0.05$  were considered the criterion of  
329 statistical significance.

330

## 331 **Results**

### 332 **Host response to hDAp transplantation**

333 hNSCs expressed over 95% of Nestin and Sox-1, proving that they were *bona*  
334 *fide* hNSC (Fig. 1C). Human dopaminergic precursors (hDAp) were obtained by  
335 incubating hNSCs with PA6-conditioned medium (PA6-CM) (Fig.1A). We  
336 observed morphological changes such as outgrowth of elongated cells (Fig.  
337 1B). After 14 days, DA precursors (DA14) expressed characteristic early DA



338 markers such as Foxa-2 ( $72,6\pm 4,7$  %) and late markers such as Tyrosine  
339 hydroxylase (TH) ( $5,5\pm 0,8$  %). By 28 days, an increase in neuron-like cells was  
340 observed. As expected for such a protocol, at 28 days, cultures contained  
341 approximately  $19,1\pm 0,9$ % TH-positive cells;  $70,5\pm 7,3$  % positive cells for the  
342 pan-neuronal marker, TUJ1; and less than 5 % of glial cells ( $3,4\pm 0,5$  % GFAP-  
343 positive cells) (Fig.1C).

344

345 **Fig 1. Dopaminergic differentiation from hNSCs.**

346 (A) Differentiation protocol was initiated by culturing hNSCs-H14, in PA6-CM for  
347 14 days (DA14). After this period, PA6-CM was supplemented with rhBDNF and  
348 rhGDNF for a period of 14 days (DA28). (B). Photographs from each stage  
349 shown morphological changes. (C) Quality control for hNSCs populations were  
350 analyzed by immunofluorescence technique for Nestin and SOX-1. Different  
351 stages of maturation from cultures of hNSCs induced to dopaminergic  
352 differentiation were analyzed by immunofluorescence. The expression of the  
353 following markers were detected and quantified at two stages of the  
354 differentiation protocol: Foxa-2 and TH for DA14 cells (DA precursors) and  
355 TUJ1; GFAP and TH for DA28. Cell nuclei were labelled by Hoechst staining.  
356 Each bar represents mean $\pm$ SEM of independent assays. Magnification: 40X.

357

358 A preparation of 250.000 hDAp with at least 80% living cells was trasplanted  
359 into the striatum of cyclosporine A-daily immunosuppressed rats during 28 days  
360 (Fig. 2A) (12). Post-mortem evaluation revealed surviving grafts, visualised by  
361 the presence of human-specific NCAM staining (Fig.2B).

362

363 **Fig 2: Primary host response related to the graft.**

364 (A) DA14 cells were obtained from hNSCs and 250000 cells (viability: 81%)  
365 were transplanted into the striatum of immunosuppressed Wistar male rats  
366 (age: 8 weeks). At different time points (1, 7, 15 and 28 days) host primary  
367 response related to the graft were analysed by immunofluorescences  
368 technique. (B) Detection of human-specific NCAM (hNCAM) allowed for  
369 identification of the graft. (D) Astrocytes (GFAP-positive cells) and activated  
370 microglia (MHCII-positive cells) related to the graft can be observed after 7 days  
371 of surgery. (E-F) There is a significant increase in MHCII+ and GFAP+ cells at  
372 15 and 28 days post graftment of hDA14 (\*p<0,05 and \*\*P<0.01). Kruskal-  
373 Wallis ANOVA followed by Dunn`s post hoc test, n=5. (G) Finally expression of  
374 TNF- $\alpha$  were observed at Day 28 post surgery. Representative pictures of the  
375 grafts are shown (Magnification: 40X). Each bar represents mean $\pm$ SEM of  
376 independent assays

377

378 Histological analysis revealed an early neutrophil infiltration (1day: 4,04e-  
379 4 $\pm$ 8.50e-5 Neutrophils/area) from the periphery, which was resolved by 7 days  
380 (5,46e-5 $\pm$ 2,25e-5 Neutrophils/area. \*p<0,05 vs. 1 day) (Fig. 2C). Astroglial  
381 activation as seen by GFAP-staining, increased 7 days after transplantation,  
382 reaching a peak at 15 days (1 day: 2,13e-4 $\pm$ 2,54e-5 vs. 15 days: 9,76e-  
383 4 $\pm$ 1,03e-4 GFAP+cells/area. \*\*p<0.01), beginning to decay at 28 days (28 days:  
384 8,34e-4 $\pm$ 9,58e-5 GFAP+cells/area. \*p<0,05 vs. 1 day) (Fig. 2D, 2E).  
385 Transplantation of hDAp in cyclosporine A-daily immunosuppressed rats  
386 resulted in microglial activation as demonstrated by the presence of MHC-II+  
387 cells, which specifically label activated microglia (16,19). MHC-II stained all the

388 activation stages but not resting microglia. According to our results, MHC-II+  
389 cells presented the typical morphology of activated microglial cells: elongated-  
390 shaped cell body with long and thicker processes and/o round-shaped body  
391 with short, thick and stout processes (Fig. 2 D). Statistical analysis of microglial  
392 activation determined by MHCII-positive cell density showed a marked increase  
393 at 15 days (1 day:  $6,67e-5 \pm 1,32e-5$  vs. 15 days:  $2,19e-4 \pm 1,96e-5$   
394 MHCII+cells/area. \* $p < 0,05$ ) which was sustained up to the last time point  
395 analysed 28 days:  $3,29e-4 \pm 2,16e-5$  MHCII+cells/area. \*\* $p < 0.01$  vs. 1 day)  
396 (Fig.2D, 2F).

397 Interestingly, tumor necrosis factor alpha (TNF- $\alpha$ ) expression was detected 28  
398 days post-surgery in ED1-positive microglial cells within the graft core and the  
399 periphery (Fig. 2G). These results show that there is a sustained host response  
400 to the transplant in immunosuppressed animals.

401

#### 402 **Conditioned media from microglia have toxic effects on hDAp: short term** 403 **effects**

404 Previously, we observed a primary response related to the xenograft of hDAp,  
405 with a significantly increase of microglial activation. As the effects of the host  
406 microglial cells on the fate of the transplanted dopaminergic precursors are  
407 poorly described, we were interested in simulate the impact of rodent microglial  
408 activation on the differentiation and survival of hDAp derived from NSCs.

409 Microglial activation using bacterial lipopolysaccharide (LPS), was analysed by  
410 determining pro-inflammatory mediators such as nitrites (NO) and TNF- $\alpha$  in the  
411 cell culture supernatant. LPS led to a significant increase in nitrite production  
412 (Basal:  $1,2 \pm 0,7$  vs. Activated (LPS):  $31,9 \pm 1,5$  uM. \*\* $P < 0.01$ ) and TNF- $\alpha$

413 secretion (Basal:  $22,3 \pm 14,3$  vs. Activated (LPS):  $739,7 \pm 76,1$  pg/ml. \* $P < 0.05$ ) 24  
414 h after cell activation (Fig. 3A, 3B). In addition, NF $\kappa$ B nuclear translocation was  
415 also observed in BV2 cell cultures after cell activation (Fig. 3C).

416

417 **Fig 3: Characterization of microglial cell activation.**

418 BV2 cultures were exposed or not (Basal) to LPS (Activated), and parameters  
419 of microglial cell activation were determined. (A) Nitrite production (Griess  
420 method) and TNF- $\alpha$  secretion (ELISA test) (B) were measured after 24 h of cell  
421 activation. (C) NF $\kappa$ B nuclear translocation was analysed by  
422 immunofluorescences after short term exposure to LPS. Significant increases in  
423 nitrite and TNF- $\alpha$  were induced by LPS treatment. Asterisks indicate statistically  
424 significant differences: nitrite, \*\* $P < 0.01$  with respect to basal condition (n=5) and  
425 \* $P < 0.05$  TNF- $\alpha$  with respect to basal condition (n=5) (Mann-Whitney test).  
426 Microscopy images of NF $\kappa$ B-stained microglia under basal conditions or  
427 activated after LPS treatment (Magnification: 40X). Values are means  $\pm$  SEM of n  
428 independent trials.

429

430 In order to analyze the short-term effect of microglial activation on hDAp, we  
431 exposed DA15 cultures to conditioned medium from BV2 cells (basal –CM-BV2  
432 Basal- or activated condition –CM-BV2 Activated-) until DA19 (Fig. 4A).  
433 Morphological analysis were performed. A decrease in neuron-like cell count  
434 (CM-BV2 Basal:  $72,8 \pm 1,9$  vs. CM-BV2 Activated:  $57,9 \pm 2,4$  %). \*\*\* $p < 0,001$ . Figure  
435 4B,4C) and neurite length of TH positive cells was detected in DA precursors  
436 cultures incubated with CM from activated microglia (CM-BV2 Basal:  
437  $339,0 \pm 31,2$  vs. CM-BV2 Activated:  $148,0 \pm 15,4$  neurites length. \*\*\* $p < 0,001$ ) (Fig.

438 4B-E). A significant reduction of TH-immunoreactive cells was detected in DA  
439 cultures exposed to CM from activated BV2 compared to basal conditions (CM-  
440 BV2 Basal:  $5,9\pm 0,4$  vs. CM-BV2 Activated:  $2,5\pm 0,4$  %TH+cells. \*\*\* $p < 0,001$ . Fig.  
441 4F, 4G). Concomitant with these results, we observed an increment in apoptotic  
442 nuclei (CM-BV2 Basal:  $7,2\pm 0,7$  vs. CM-BV2 Activated:  $21,4\pm 2,5$  % apoptotic  
443 cells. \*\* $p < 0,01$ . Fig. 4I) and caspase activated 3 (CA3)-positive cells (Fig. 4H) in  
444 DA precursors after 4 days of incubation with CM from activated microglia.

445

446 **Fig 4. Effect of the activated microglia CM in the differentiation of DA**  
447 **precursors.**

448 (A) DA15 cultures were exposed to microglia CM (Basal or Activated) until day  
449 19 (DA19). (B-E) For semi-quantitative analysis, photographs from independent  
450 experiments were analyzed to determine neuron-like cell count and neurites  
451 length. Asterisks indicate statistically differences (\*\* $p < 0.001$ . Unpaired T-test.  
452  $n=7$ ) in percentage of neural-cell-like (C) and neurite length (E) of DA  
453 precursors cultured under inflammatory conditions (CM-BV2 activated) versus  
454 basal (CM-BV2 basal). There is a decrease in the number of cells with neuronal  
455 morphology and neurite length in DA precursors exposed with CM-BV2  
456 activated. (F) Confocal images of TH-stained DA19 cell cultures. G) Asterisks  
457 indicate statistically differences (\*\* $p < 0.001$ . Unpaired T-test.  $n=9$ ) for cell  
458 counting assays of TH+ cells of DA precursors cultured with CM-BV2 activated  
459 versus basal (CM-BV2 basal). (H-I) Cell death was analyzed by fluorescence  
460 microscopy using Hoechst and detection of activated caspase 3 (CA3) by  
461 immunofluorescence. (H) Arrowheads indicate apoptotic nucleus and CA3-  
462 immunoreactive cell. An increment of CA3-positive cells (see indicator arrows)

463 was observed in DA precursors incubated with CM-BV2 activated (40x  
464 magnification). (I) Asterisks show statistically significant differences (\*\*p<0.01.  
465 Mann Whitney. n=6) in DA precursors incubated with CM-BV2 activated versus  
466 CM-BV2 basal. Values are means±SEM for the percentage of apoptotic cells  
467 relative to the total cell number.

468

### 469 **Conditioned media from microglia have toxic effects on hDAp: long term** 470 **effects**

471 In order to know if the short term effects after acute exposure to inflammatory  
472 conditions were transient or not, the protocol described before were carried out  
473 until DA19. Then, cell medium was replaced with PA6-CM (DA differentiation  
474 medium) and then, at the final stage of DA differentiation protocol (DA28),  
475 survival and morphological parameters were studied (Fig. 5A). At DA28, a  
476 statistical reduction in the percentage of neuronal-like cells (CM-BV2 Basal:  
477 89,6±2,9 vs. CM-BV2 Act: 64,5±3,9 %. \*\*\*p<0,001) and neurite length (CM-  
478 BV2 Basal: 383,6±24,9 vs. CM-BV2 Act: 183,5±24,1. \*\*\*p<0,001) were detected  
479 in those cultures who were exposed for an acute period of time to a microglial  
480 activated-environment (CM-BV2 Activated) (Fig. 5B-E). Moreover, a reduction in  
481 the percentage of TUJ1-positive cells, in cell cultures exposed with CM-BV2  
482 Activated was observed (CM-BV2 Basal: 54,0±3,1 vs. CM-BV2 Act: 29,8±0,9  
483 %TUJ1+cells. \*\*\*p<0,001) (Fig. 8C, 8E). In addition, our results showed  
484 significant decrease in the percentage of TH-positive cells in DA cultures  
485 treated with CM from activated BV2 (CM-BV2 Basal: 9,8±0,5 vs. CM-BV2 Act:  
486 4,3±0,5 %TH+cells. \*\*\*p<0,001) (Fig. 5F, 5G). We conclude that there is no

487 recovery of TH-positive cells in cultures initially incubated under inflammatory  
488 conditions.

489

490 **Fig 5. Impact of pro-inflammatory microenvironment on DA cultures.**

491 (A) CM from basal and activated condition were added to DA precursors and  
492 incubated during 4 days. Morphological analysis and detection of DA neurons  
493 were performed at DA28. (B-E) For semi-quantitative analysis, photographs  
494 from independent experiments were analyzed to study morphological alterations  
495 and determine neuron-like cell count and neurites length. Asterisks indicate  
496 statistically significant differences at DA28 stage (\*\* $p < 0.001$ . Unpaired T-test.  
497  $n=6$ ) in the percentage of neural-cell-like (C) and neurite length of TH-positive  
498 cells (\*\* $p < 0.001$ . Unpaired T-test.  $n=6$ ) (E) of hDAp cells cultured under  
499 inflammatory conditions (CM-BV2 activated) versus basal (CM-BV2 basal). (F-  
500 G) Cell counting of TH-positive cells was performed. Representative  
501 photomicrographs from TH immunofluorescence (40x) of DA28 cells obtained  
502 from DA28 cultured with CM-BV-2 (basal and activated condition) are shown.  
503 Asterisks indicate statistically significant differences (\*\* $p < 0.001$ . Unpaired T-  
504 test.  $n=6$ ) for cell counting assays of TH+ cells of hDAp cultured under  
505 inflammatory conditions (CM-BV2 activated) versus basal microenvironment  
506 (CM-BV2 Basal) (G). Values are means $\pm$ SEM of  $n$  independent trials.

507

508 **Functional effects of TNF- $\alpha$  on survival and differentiation of DA**  
509 **precursors**

510 Previously, the pro-inflammatory cytokine TNF- $\alpha$  was observed to be expressed  
511 after transplantation (Fig. 2G), which was detected in cell culture supernadant of

512 activated microglia (Fig. 3B). Earlier studies reported cytotoxic effects of TNF- $\alpha$   
513 in neural cell lines (20). These findings lead us to study the role of TNF- $\alpha$  in the  
514 differentiation and survival of hDAp.

515 DA15 were cultured with CM-BV2 (basal or activated condition) during 4 days  
516 as previously described, with or without Etanercept (a TNF- $\alpha$  inhibitor) as co-  
517 treatment (Fig. 6A). Neuronal differentiation was analysed by cell morphology  
518 and TUJ1-cell counting. Acute exposure to CM from activated microglia (CM-  
519 BV2 Act) affected cell morphology and TUJ1-positive cell percentage (CM-BV2  
520 Basal:  $43,9 \pm 1,4$  vs. CM-BV2 Act:  $30,3 \pm 1,4$  %TUJ1+cell. \*\*\* $p < 0,001$ ), while  
521 TNF- $\alpha$  blockage was able to reverse neuronal loss (CM-BV2 Act+Etan:  
522  $40,9 \pm 1,7$  vs. CM-BV2 Act:  $30,3 \pm 1,4$  %TUJ1+cell. \*\* $p < 0,01$ ) (Fig. 6B-E).

523

524 **Fig 6. Effect of TNF- $\alpha$  inhibitor on differentiation of DA precursors**  
525 **exposed to activated microglia CM.**

526 (A) DA precursors were exposed with CM-BV2 during the 4 days, in the  
527 presence of Etanercept (a TNF- $\alpha$  inhibitor). (B) For semi-quantitative analysis,  
528 photographs from independent experiments were analyzed to determine  
529 neuron-like cell count. (C) Detection of TUJ1+ cells by immunofluorescence and  
530 cell counting were performed at DA19. Photomicrographs are shown (40x). (D)  
531 Asterisks indicate statistically significant differences in percentage of neural-cell  
532 like DA precursors cultured under inflammatory conditions (CM-BV2 activated)  
533 versus basal (CM-BV2 basal) (\* $p < 0.01$  CM-BV2 Act vs. CM-BV2 Basal).  
534 Inhibition of TNF- $\alpha$  prevents the decrease in the number of cells with neuronal  
535 morphology (\* $p < 0.05$  CM-BV2 Act vs. CM-BV2 Act+Etan). ANOVA followed by  
536 Tukey`s post hoc test. n=4 independent assays. (E) Asterisks indicate



537 statistically significant differences in percentages of TUJI+ cells of hDAP  
538 cultured with CM from activated BV2 cultures versus CM from BV2 cells under  
539 basal conditions (\*\*p<0.001 CM-BV2 Act vs. CM-BV2 Basal). Co-incubation of  
540 hDAP with Etanercept inhibited TUJI+ cells diminution (\*\*p<0.01 CM-BV2 Act  
541 vs. CM-BV2 Act+Etan). ANOVA followed by Bonferroni test. n=5 independent  
542 assays. Values are means  $\pm$  SEM of n independent trials.

543

544 In addition, Etanercept had no effects on the expression of TH when hDAP were  
545 incubated with CM from basal BV2 cells. However, inflammatory-mediated  
546 suppression of TH expression was overtly reversed by Etanercept co-treatment  
547 (CM-BV2 Act+Etan:  $5,7\pm 0,5$  vs. CM-BV2 Act:  $2,6\pm 0,5$  %TH+cells. \*\*p<0,01)  
548 (Fig.7B, 7E). Quantification of neurite length of DA19 indicated that, while pro-  
549 inflammatory conditions caused a decrease in neurite length, co-treatment with  
550 Etanercept reduced these alterations in TH-positive cells (Fig. 7C, 7D). Finally,  
551 we measured cell death in DA19. Our results suggest that TNF- $\alpha$  mediated  
552 inhibition partially reduced the percentage of apoptotic cells (Fig. 7F).

553

554 **Fig 7. Effect of TNF- $\alpha$  inhibitor on survival and neurite length of DA**  
555 **precursors exposed to inflammatory conditions.**

556 (A) DA precursors were cultured in the presence of CM-BV2 (basal or activated  
557 condition) during 4 days, in the presence of Etanercept as co-treatment. (B)  
558 Detection of TH+cells by immunofluorescence and cell counting were  
559 performed at DA19. Photomicrographs from immunofluorescence are shown  
560 (40x). (C) Neurite length analyzes of TH+ cells were also performed at DA19.  
561 Photomicrographs are shown (40x). (D) Decrease in neurite length were

562 observed after exposure of DA precursors to activated CM-BV2 (\*\*p<0.01 vs.  
563 CM-BV2 Basal). Inhibition of TNF- $\alpha$  reduces alterations in neurite length of TH+  
564 cells (\*\*p<0.01 CM-BV2 Act vs. CM-BV2 Act+Etanercept). ANOVA followed by  
565 Bonferroni test. n=4. (E) Exposure of DA precursors to activated CM-BV2  
566 decreased the percentage of TH+ cells (\*\* p <0.001 vs. CM-BV2 Basal).  
567 Inhibition of TNF- $\alpha$  prevents TH+ cell loss (\*\*p<0.01 CM-BV2 Act vs. CM-BV2  
568 Act+Etan. ANOVA followed by Bonferroni test. n=7). (F) Cell death was  
569 analyzed by apoptotic nucleus counting after Hoechst staining. The results  
570 showed that exposure of DA precursors to CM- from activated microglia  
571 significantly increase in cell death (\*p<0.05 vs. CM-BV2 Basal. Kruskal-Wallis  
572 test ANOVA followed by Dunn`s test. n=7). Partial reduction of apoptotic cells  
573 are detected in cell culture treated with Etanercept. Values are means $\pm$ SEM of  
574 n independent trials.

575

576 Similar effects of TNF- $\alpha$  inhibition were observed in all parameters studied  
577 previously at the terminal differentiation stage (DA28), suggesting a persistent  
578 protection of the hDAp after Etanercept treatment (Fig. 8 and 9).

579

580 **Fig 8. Inhibition of TNF- $\alpha$  and final differentiation of DA precursors**  
581 **exposed to proinflammatory conditions.**

582 (A) DA precursors were exposed with CM-BV2 (basal or activated condition)  
583 during the 4 days, in the presence of Etanercept. At DA19, cell media was  
584 changed to PA6-CM. Morphological assay and detection of TUJ1+ cells by  
585 immunofluorescence were performed at DA28. (B, D) For semi-quantitative  
586 analysis, photographs from independent experiments were analyzed to

587 determine neuron-like cell count. Asterisks indicate statistically significant  
588 differences in percentage of neural-cell-like of DA precursors cultured under  
589 inflammatory conditions (CM-BV2 activated) versus basal (CM-BV2 basal)  
590 (\*\* $p < 0.01$  CM-BV2 Act vs. CM-BV2 Basal). Inhibition of TNF- $\alpha$  prevents the  
591 decrease in the number of cells with neuronal morphology (\* $p < 0.05$  CM-BV2  
592 Act vs. CM-BV2 Act+Etan). ANOVA followed by Tukey`s post hoc test.  $n=4$ . (C,  
593 E) Photomicrographs from TUJ1 immunofluorescence (40x) of DA28 cultures are  
594 shown. Asterisks indicate statistically significant differences in percentages of  
595 TUJ1+ cells of DA cultures exposed with CM from activated BV2 cultures  
596 versus CM from BV2 cells under basal conditions (\*\*\* $p < 0.001$  CM-BV2 Act vs.  
597 CM-BV2 Basal). Co-incubation of DA cell cultures with Etanercept inhibited  
598 TUJ1+ cells diminution (\*\* $p < 0.01$  CM-BV2 Act vs. CM-BV2 Act+Etan.) ( $n=7$   
599 independent assays). ANOVA followed by Bonferroni test. Values are  
600 means $\pm$ SEM of  $n$  independent trials.

601

602 **Fig 9. Long term study of Etanercept effect on DA cultures exposed to**  
603 **acute inflammatory conditions.**

604 (A) DA precursors were cultured in the presence of CM-BV2 (basal or activated  
605 condition) during the 4 days. A co-treatment of DA precursors with CM-BV2 and  
606 Etanercept were performed. (B-C) At DA28, immunofluorescence against the  
607 dopaminergic marker TH and neurite length analyzes were performed. Cell  
608 death was analyzed by apoptotic nucleus counting after Hoechst staining.  
609 Photomicrographs from immunofluorescence are shown (40x). (D) Diminution in  
610 neurite length were observed in DA cultures incubated to CM from activated  
611 BV2 (\*\*\* $p < 0.001$  CM-BV2 Act vs. CM-BV2 Basal). Inhibition of TNF- $\alpha$  reduces

612 alterations in neurite length of DA cells (\*\* $p < 0.01$  CM-BV2 Act vs. CM-BV2  
613 Act+Etan. ANOVA followed by Bonferroni test.  $n=6$ ). E) Acute exposure of DA  
614 precursors to CM from activated microglia decreased the final percentage of  
615 TH+ cells (\*\* $p < 0.001$  CM-BV2 Act vs. CM-BV2 Basal). Etanercept co-  
616 incubation was able to prevent TH+ cell loss (\*\* $p < 0.001$  CM-BV2 Act vs. CM-  
617 BV2 Act+Etan. ANOVA followed by Bonferroni test). (F) The results from cell  
618 death analyses show that acute exposure of DA precursors to CM- from  
619 activated microglia increase in cell death (\* $p < 0.05$  vs. CM-BV2 Basal. Kruskal-  
620 Wallis test ANOVA followed by Dunn's test.  $n=7$ ). Etanercept was able to  
621 reduce the percentage of apoptotic cells. Values are means $\pm$ SEM of  $n$   
622 independent trials.

623

## 624 **Discussion**

625 Cell replacement therapy involves disruption of the blood–brain barrier (BBB)  
626 and host tissue damage, which cause astrocyte and microglia activation  
627 (21,22). Therefore, grafted cells are surrounded by an altered environment  
628 where host tissue signals could affect relevant processes for the efficacy of cell  
629 therapy, such as survival and differentiation of DA precursors.

630 In this study, we have investigated for the first time the short-term response of  
631 the cerebral parenchyma to human DA precursors (hDAp) transplantation and  
632 further studied the effects of the microglia response on hDAp viability and  
633 differentiation *in vitro*. We show that a glial response was sustained in time after  
634 transplantation, together with TNF- $\alpha$  expression, under immunosuppression  
635 conditions. *In vitro*, acute exposure to conditioned media (CM) from activated  
636 microglia diminished the percentage of TH positive cells, induced cell death and

637 affected the differentiation process. In addition, this acute pro-inflammatory  
638 treatment of hDAp had a negative impact on terminal differentiation. Finally,  
639 specific inhibition of TNF- $\alpha$  reduced the loss of hDAp and the alterations in  
640 morphology.

641 In our *in vivo* model, a short-term host primary response related to the grafted  
642 hDAp (DA14) was detected with a significant increase of host MHCII- and  
643 GFAP-positive cells in adult immunosuppressed male rats. These observations  
644 were supported using other cell types who demonstrated an early increase in  
645 Iba1- and GFAP-positive cells following a NSC graft, until day 3 post-surgery  
646 (22). Further support to our observations come from work by Tomov and  
647 colleges who observed microglia and GFAP-positive cells between 7 and 28  
648 days after allogeneic transplantation of ventral mesencephalic (VM) cells in a  
649 rodent model of PD (6,23). In addition, MHCII-positive cells around hDAp grafts  
650 derived from iPSCs were detected long-term in a PD model of  
651 immunosuppressed non-human primates (24). At the molecular level, we  
652 observed expression of the pro-inflammatory cytokine TNF- $\alpha$  in host-microglia  
653 (ED-1)-positive cells after transplantation with hDAp. Interestingly, TNF- $\alpha$  was  
654 also detected on the acute period following VM neuroblasts allogeneic grafts  
655 from rodents (25) and in allogeneic and xenogeneic transplantation of VM  
656 neuroblasts from rodents and pig, respectively (26). Therefore, our data extend  
657 and support previous observations on an early host response after brain  
658 grafting of other cell types and animal models. Taken together, we preliminary  
659 conclude that there seems to be no overt specificity on the host innate immune  
660 response to different transplanted cell types at the cellular level.

661 We also developed an *in vitro* approach which partially simulates the pro-  
662 inflammatory microenvironment from the host response related to the graft. This  
663 system is based on exposure of hDAp derived from human NSCs to conditioned  
664 media from activated BV-2 microglial cells at short-(DA19) and long-term  
665 (DA28) end points. Previous research has demonstrated that BV2 cells are a  
666 valid model of primary microglia culture (27). In addition, rodent TNF can  
667 activate human TNFRI and TNFRII (28). Other microglial models such as  
668 primary microglial cultures or human iPSC-derived microglia could be used in  
669 future experiments to test similar hypotheses as in this work.

670 Our results showed a significant increase in cell death of DA precursors  
671 exposed with CM from activated microglia by means of a decrease in TH-  
672 positive cells in early and late cell culture stages. Our data on cell death extend  
673 similar effects of CM from activated microglia observed in other cell types such  
674 as SH-SY5Y and PC12 cultures (10,15). Previous reports suggest that the  
675 crosstalk between the Bcl family and NF- $\kappa$ B could be involved in DAN  
676 vulnerability (29,30). The functional role of these molecules required further  
677 analyses.

678 We also observed morphological alterations specifically induced by CM from  
679 activated microglia, such as a decrease in neuron-like cells and neurite length  
680 of TH-positive cells at both stages of DA differentiation. Moreover, the  
681 percentage of TUJ1-positive cells, a pan-neuronal marker, was diminished by  
682 microglia activation. Interestingly, using human cortical neural progenitor cells,  
683 TNF- $\alpha$  treatment during six days reduced TUJ1 percentage and increase  
684 GFAP-positive cells, suggesting that this cytokine inhibited neuronal  
685 differentiation (31). Altogether, our results and others indicate that activated

686 microglial cells and TNF- $\alpha$  could play a role in the survival and differentiation of  
687 hDAp and other cells after transplantation.

688 From the evidence obtained *in vivo*, we were interested in analyzing the effect  
689 of TNF- $\alpha$  on hDAp. Co-treatment of activated CM with Etanercept, a TNF- $\alpha$   
690 inhibitor, was able to reverse the reduction of TH-positive cells, cell death and  
691 morphological alterations previously observed in hDAp. These results extend a  
692 previous finding which reported that inhibition of TNF- $\alpha$  reversed the reduction  
693 of DA markers and morphological alterations in other cells such as human TH-  
694 positive cells derived from Synovial adipose stem cells (32).

695 As we mentioned above, none of the current PD therapies stops  
696 neurodegeneration or functionally replaces dopaminergic neuronal loss.  
697 Currently, a remarkable effort is being made in order to take cell replacement  
698 therapy for PD to the clinic (5). Recently, in 2018, the first clinical trial using  
699 GMP-grade hDAp derived from iPSCs was launched, a case report of  
700 autologous-cell therapy for PD was published last year and a phase 1 study  
701 to evaluate pluripotent stem cell-derived hDAp in patients with PD was  
702 approved by the regulatory authorities of US (33,34). Survival, differentiation  
703 and integration of the transplanted precursors are biological processes that  
704 could influence the effectiveness of this strategy and are affected by the host  
705 response (21).

706 In particular, a major limiting factor of cell replacement therapy for PD is still the  
707 poor survival rate (10%) of grafted DA precursors (35). Our study points to TNF-  
708  $\alpha$  inhibition as a possible strategy to increase survival and differentiation of  
709 grafted hDAp. It remains to be determined whether the sole inhibition of TNF or  
710 any of its receptors after transplantation is necessary and sufficient to inhibit the

711 deleterious effects of inflammation as we have observed *in vitro*. Nevertheless,  
712 several TNF- $\alpha$  inhibitors are clinically available for other diseases. A possible  
713 strategy that could be used is the transplantation of DA precursors along with  
714 co-infusion of a TNF inhibitor or monoclonal antibodies since inhibitors against  
715 TNF- $\alpha$  such as Etanercept and TNF-R1 antagonist as ATROSAB cannot cross  
716 BBB under physiological conditions. Alternatively, since cell transplantation  
717 include temporal BBB disruption, treatment with agents to neutralize TNF- $\alpha$   
718 deleterious action could be used immediately after surgery. On the other hand,  
719 the peripheral administration of a soluble TNF- $\alpha$  inhibitor (XPro1595) was  
720 neuroprotective on an *in vivo* model of PD (36). Then, molecules such as  
721 XPro1595 could be good candidates to be used in animals models of cell  
722 replacement therapy for PD in order to analyze its potential in this specific  
723 strategy.

724 In conclusion, our data indicate that microglia-derived TNF- $\alpha$  plays a key role in  
725 the possible effects of the host response to hDAp transplantation by affecting  
726 survival and differentiation at short and long-term. Selective targeting of TNF- $\alpha$   
727 holds translational potential to increase survival and differentiation of DA  
728 precursors even under immune suppressive treatments targetting the adaptive  
729 immune response. Finally, the *in vitro* model described might be useful to study  
730 the mechanism of action of microglia on hDAp and search for potentials anti-  
731 inflammatory and/or neuroprotective treatments in order to improve survival and  
732 differentiation efficacy of hDAp.

733



734 **Author Contributions**

735 Conceptualization: FJP. Investigation and Methodology: SDW, VG, CG, MIF,  
736 JB. Formal Analysis: SDW, FJP. Project Administration: SDW, FJP. Funding  
737 Acquisition: FJP, SDW. Writing – Original Draft Preparation: SDW, FJP. Writing  
738 – Review & Editing: CF, CG. SDW, CF, CG, JB, FJP are members of the  
739 research career of CONICET. MIF is member of the MTA career of CONICET.

740

741 **References**

- 742 1. Dorsey ER, Bloem BR. The Parkinson Pandemic—A Call to Action. *JAMA*  
743 *Neurol.* 2018 Jan 1;75(1).
- 744 2. Coelho M, Ferreira JJ. Late-stage Parkinson disease. *Nat Rev Neurol.*  
745 2012 Aug 10;8(8).
- 746 3. Wenker SD, Leal MC, Farías MI, Zeng X, Pitossi FJ. Cell therapy for  
747 Parkinson's disease: Functional role of the host immune response on  
748 survival and differentiation of dopaminergic neuroblasts. *Brain Res.* 2016  
749 May;1638.
- 750 4. Brundin P, Strecker RE, Widner H, Clarke DJ, Nilsson OG, Astedt B, et al.  
751 Human fetal dopamine neurons grafted in a rat model of Parkinson's  
752 disease: immunological aspects, spontaneous and drug-induced  
753 behaviour, and dopamine release. *Exp Brain Res.* 1988;70(1):192–208.
- 754 5. Parmar M, Grealish S, Henchcliffe C. The future of stem cell therapies for  
755 Parkinson disease. *Nat Rev Neurosci.* 2020 Feb 6;21(2).
- 756 6. Tomov N, Surchev L, Wiedenmann C, Döbrössy MD, Nikkhah G.  
757 Astrogliosis has Different Dynamics after Cell Transplantation and  
758 Mechanical Impact in the Rodent Model of Parkinson's Disease. *Balkan*

- 759 Med J. 2018 Mar 15;35(2).
- 760 7. Hassanzadeh K, Rahimmi A. Oxidative stress and neuroinflammation in  
761 the story of Parkinson's disease: Could targeting these pathways write a  
762 good ending? J Cell Physiol. 2019 Jan;234(1).
- 763 8. Peng J, Liu Q, Rao MS, Zeng X. Using Human Pluripotent Stem Cell–  
764 Derived Dopaminergic Neurons to Evaluate Candidate Parkinson's  
765 Disease Therapeutic Agents in MPP<sup>+</sup> and Rotenone Models. J Biomol  
766 Screen. 2013 Jun 30;18(5).
- 767 9. Liu Q, Pedersen OZ, Peng J, Couture LA, Rao MS, Zeng X. Optimizing  
768 dopaminergic differentiation of pluripotent stem cells for the manufacture  
769 of dopaminergic neurons for transplantation. Cytotherapy. 2013  
770 Aug;15(8).
- 771 10. Dai X, Li N, Yu L, Chen Z, Hua R, Qin X, et al. Activation of BV2 microglia  
772 by lipopolysaccharide triggers an inflammatory reaction in PC12 cell  
773 apoptosis through a toll-like receptor 4-dependent pathway. Cell Stress  
774 Chaperones. 2015 Mar 12;20(2).
- 775 11. Paxinos G, Watson C. The rat brain in stereotaxic coordinates. Orlando,  
776 FL: Academic Press; 1986.
- 777 12. Brüstle O, Cunningham MG, Tabar V, Studer L. Experimental  
778 Transplantation in the Embryonic, Neonatal, and Adult Mammalian Brain.  
779 Curr Protoc Neurosci. 1997 Nov;1(1).
- 780 13. Jensen MB, Krishnaney-Davison R, Cohen LK, Zhang S-C. Injected  
781 Versus Oral Cyclosporine for Human Neural Progenitor Grafting in Rats. J  
782 Stem Cell Res Ther. 2012;01(S10).
- 783 14. Papazian I, Kyrargyri V, Evangelidou M, Voulgari-Kokota A, Probert L.

- 784 Mesenchymal Stem Cell Protection of Neurons against Glutamate  
785 Excitotoxicity Involves Reduction of NMDA-Triggered Calcium Responses  
786 and Surface GluR1, and Is Partly Mediated by TNF. *Int J Mol Sci.* 2018  
787 Feb 25;19(3).
- 788 15. Wenker SD, Chamorro ME, Vittori DC, Nesse AB. Protective action of  
789 erythropoietin on neuronal damage induced by activated microglia. *FEBS*  
790 *J.* 2013 Apr;280(7).
- 791 16. Silva BA, Leal MC, Farías MI, Avalos JC, Besada CH, Pitossi FJ, et al. A  
792 new focal model resembling features of cortical pathology of the  
793 progressive forms of multiple sclerosis: Influence of innate immunity.  
794 *Brain Behav Immun.* 2018 Mar;69.
- 795 17. López-Carballo G, Moreno L, Masiá S, Pérez P, Baretino D. Activation of  
796 the Phosphatidylinositol 3-Kinase/Akt Signaling Pathway by Retinoic Acid  
797 Is Required for Neural Differentiation of SH-SY5Y Human Neuroblastoma  
798 Cells. *J Biol Chem.* 2002 Jul;277(28).
- 799 18. Bonafina A, Fontanet PA, Paratcha G, Ledda F. GDNF/GFR $\alpha$ 1 Complex  
800 Abrogates Self-Renewing Activity of Cortical Neural Precursors Inducing  
801 Their Differentiation. *Stem Cell Reports.* 2018 Mar;10(3).
- 802 19. Pott Godoy MC, Ferrari CC, Pitossi FJ. Nigral neurodegeneration  
803 triggered by striatal AdIL-1 administration can be exacerbated by  
804 systemic IL-1 expression. *J Neuroimmunol.* 2010;222(1–2).
- 805 20. Pregi N, Wenker S, Vittori D, Leirós CP, Nesse A. TNF-alpha-induced  
806 apoptosis is prevented by erythropoietin treatment on SH-SY5Y cells. *Exp*  
807 *Cell Res.* 2009 Feb;315(3).
- 808 21. Salado-Manzano C, Perpiña U, Straccia M, Molina-Ruiz FJ, Cozzi E,

- 809 Rosser AE, et al. Is the Immunological Response a Bottleneck for Cell  
810 Therapy in Neurodegenerative Diseases? *Front Cell Neurosci.* 2020 Aug  
811 11;14.
- 812 22. Hoornaert CJ, Le Blon D, Quarta A, Daans J, Goossens H, Berneman Z,  
813 et al. Concise Review: Innate and Adaptive Immune Recognition of  
814 Allogeneic and Xenogeneic Cell Transplants in the Central Nervous  
815 System. *Stem Cells Transl Med.* 2017 May;6(5).
- 816 23. Tomov N, Surchev L, Wiedenmann C, Döbrössy M, Nikkhah G.  
817 Roscovitine, an experimental CDK5 inhibitor, causes delayed suppression  
818 of microglial, but not astroglial recruitment around intracerebral  
819 dopaminergic grafts. *Exp Neurol.* 2019 Aug;318.
- 820 24. Kikuchi T, Morizane A, Doi D, Magotani H, Onoe H, Hayashi T, et al.  
821 Human iPS cell-derived dopaminergic neurons function in a primate  
822 Parkinson's disease model. *Nature.* 2017 Aug 31;548(7669).
- 823 25. Clarke DJ, Branton RL. A Role for Tumor Necrosis Factor  $\alpha$  in Death of  
824 Dopaminergic Neurons Following Neural Transplantation. *Exp Neurol.*  
825 2002 Jul;176(1).
- 826 26. Mirza B, Krook H, Andersson P, Larsson LC, Korsgren O, Widner H.  
827 Intracerebral cytokine profiles in adult rats grafted with neural tissue of  
828 different immunological disparity. *Brain Res Bull.* 2004 Mar;63(2).
- 829 27. Henn A, Lund S, Hedtjärn M, Schratzenholz A, Pörzgen P, Leist M. The  
830 suitability of BV2 cells as alternative model system for primary microglia  
831 cultures or for animal experiments examining brain inflammation. Vol. 26,  
832 *Altex.* 2009.
- 833 28. Bossen C, Ingold K, Tardivel A, Bodmer J-L, Gaide O, Hertig S, et al.

- 834 Interactions of Tumor Necrosis Factor (TNF) and TNF Receptor Family  
835 Members in the Mouse and Human. *J Biol Chem.* 2006 May;281(20).
- 836 29. Bellucci A, Bubacco L, Longhena F, Parrella E, Faustini G, Porrini V, et al.  
837 Nuclear Factor- $\kappa$ B Dysregulation and  $\alpha$ -Synuclein Pathology: Critical  
838 Interplay in the Pathogenesis of Parkinson's Disease. *Front Aging*  
839 *Neurosci.* 2020 Mar 24;12.
- 840 30. Seiz EG, Ramos-Gómez M, Courtois ET, Tønnesen J, Kokaia M, Liste  
841 Noya I, et al. Human midbrain precursors activate the expected  
842 developmental genetic program and differentiate long-term to functional  
843 A9 dopamine neurons in vitro. Enhancement by Bcl-XL. *Exp Cell Res.*  
844 2012 Nov;318(19).
- 845 31. Lan X, Chen Q, Wang Y, Jia B, Sun L, Zheng J, et al. TNF- $\alpha$  Affects  
846 Human Cortical Neural Progenitor Cell Differentiation through the  
847 Autocrine Secretion of Leukemia Inhibitory Factor. *PLoS One.* 2012 Dec  
848 7;7(12).
- 849 32. Herrmann M, Anders S, Straub RH, Jenei-Lanzl Z. TNF inhibits  
850 catecholamine production from induced sympathetic neuron-like cells in  
851 rheumatoid arthritis and osteoarthritis in vitro. *Sci Rep.* 2018 Dec 25;8(1).
- 852 33. Takahashi J. iPS cell-based therapy for Parkinson's disease: A Kyoto  
853 trial. *Regen Ther.* 2020 Mar;13.
- 854 34. Takahashi J. Clinical Trial for Parkinson's Disease Gets a Green Light in  
855 the US. *Cell Stem Cell.* 2021 Feb;28(2).
- 856 35. Brundin P, Karlsson J, Emgård M, Schierle GSK, Hansson O, Petersén Å,  
857 et al. Improving the Survival of Grafted Dopaminergic Neurons: A Review  
858 over Current Approaches. *Cell Transplant.* 2000 Mar 22;9(2).

859 36. Fischer R, Kontermann RE, Pfizenmaier K. Selective Targeting of TNF  
860 Receptors as a Novel Therapeutic Approach. *Front Cell Dev Biol.* 2020  
861 May 26;8.  
862  
863

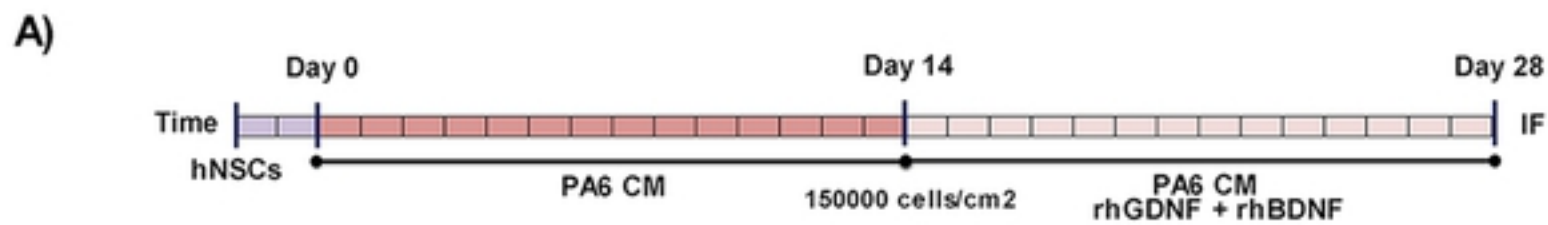

**B)**

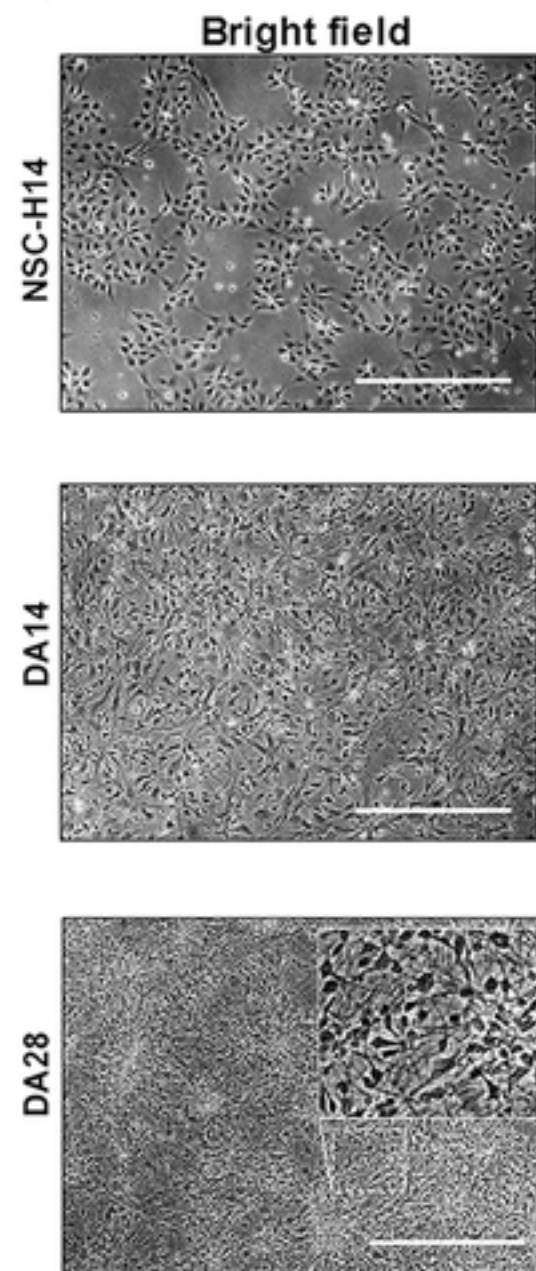

**C)**

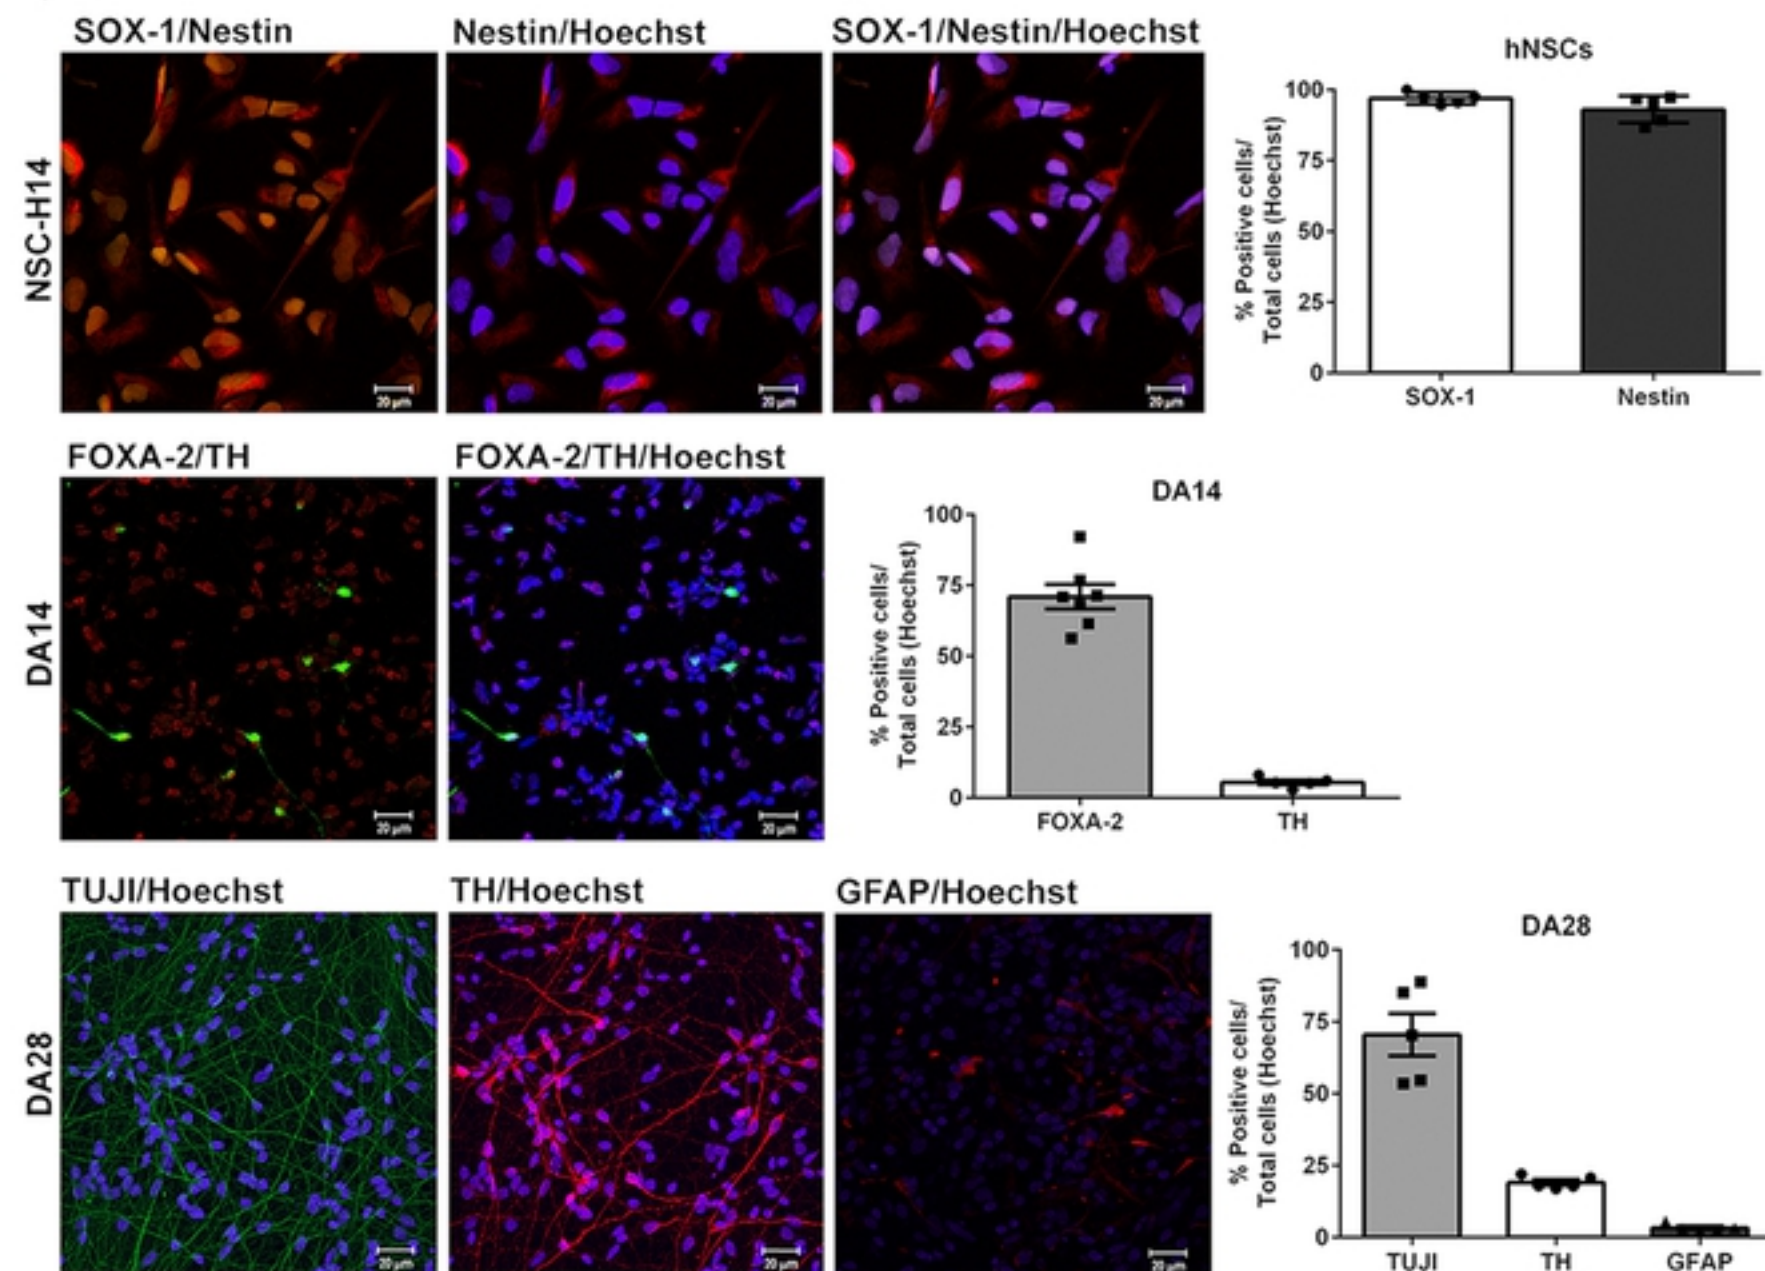

Figure 1

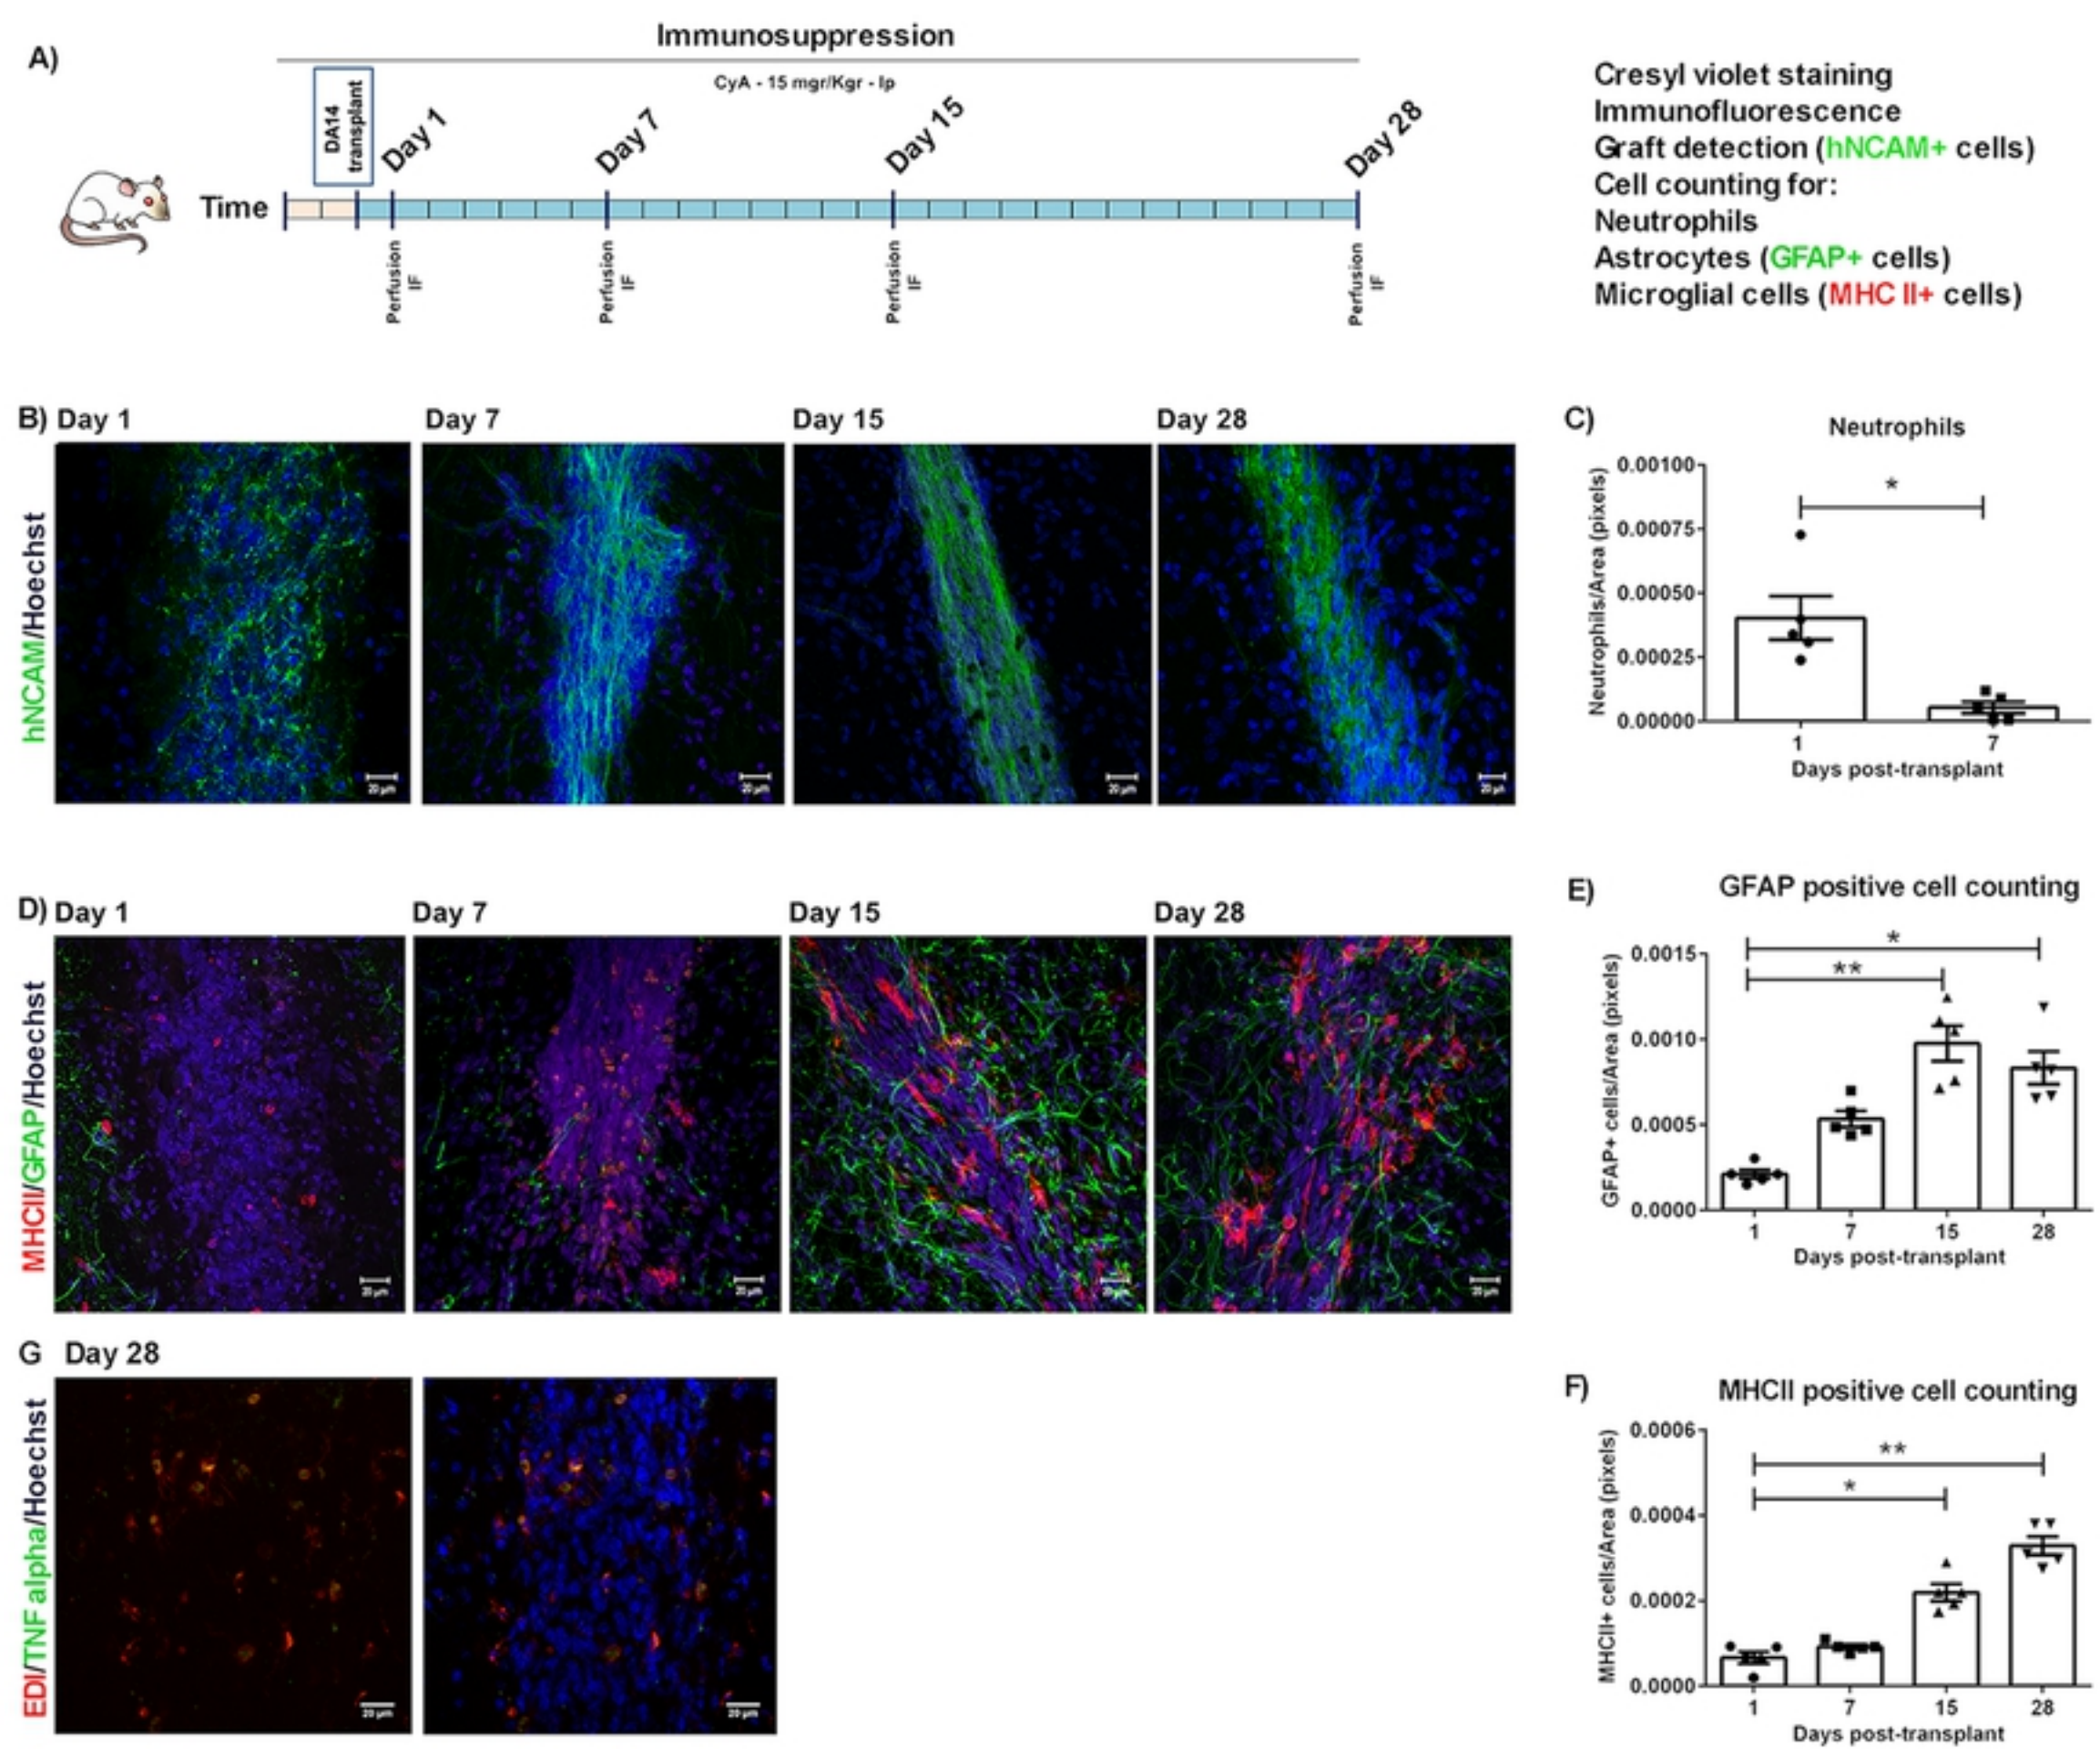

Figure 2



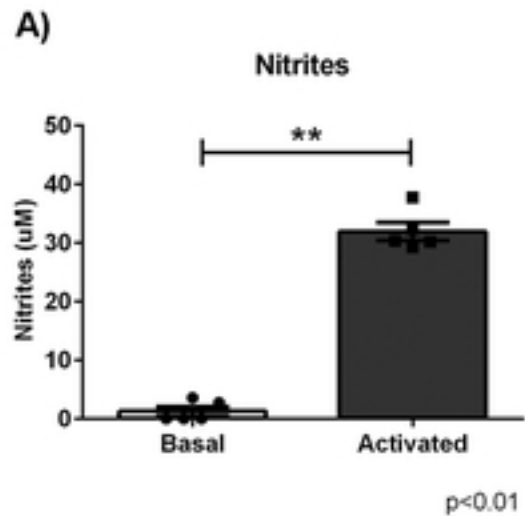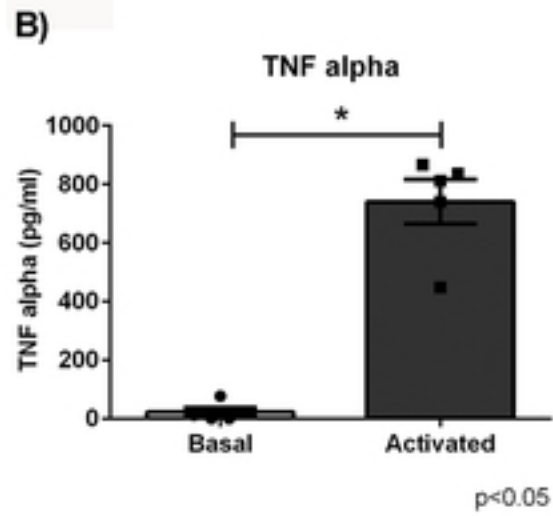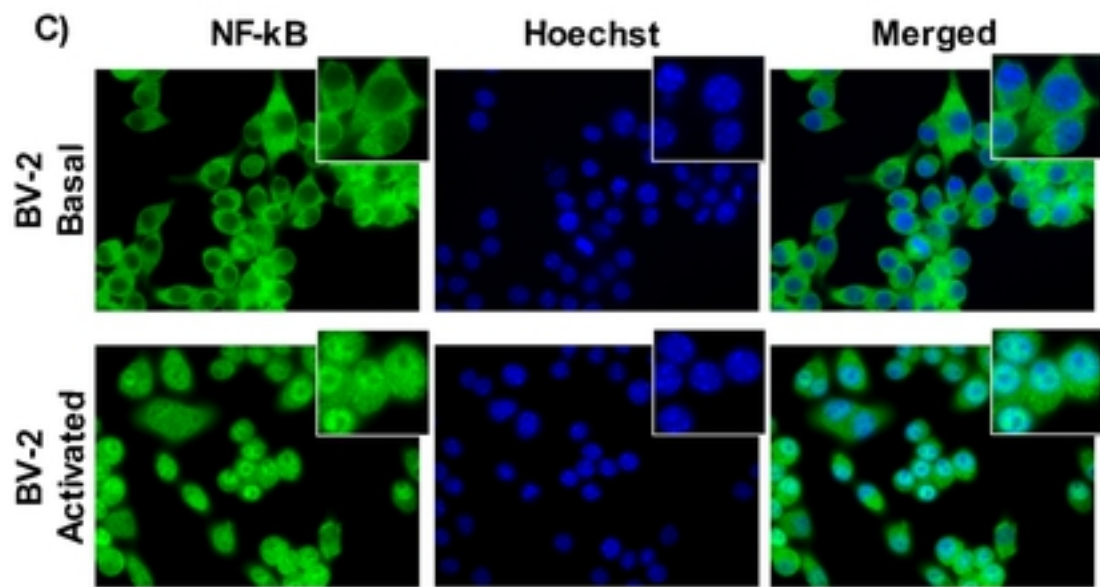

Figure 3

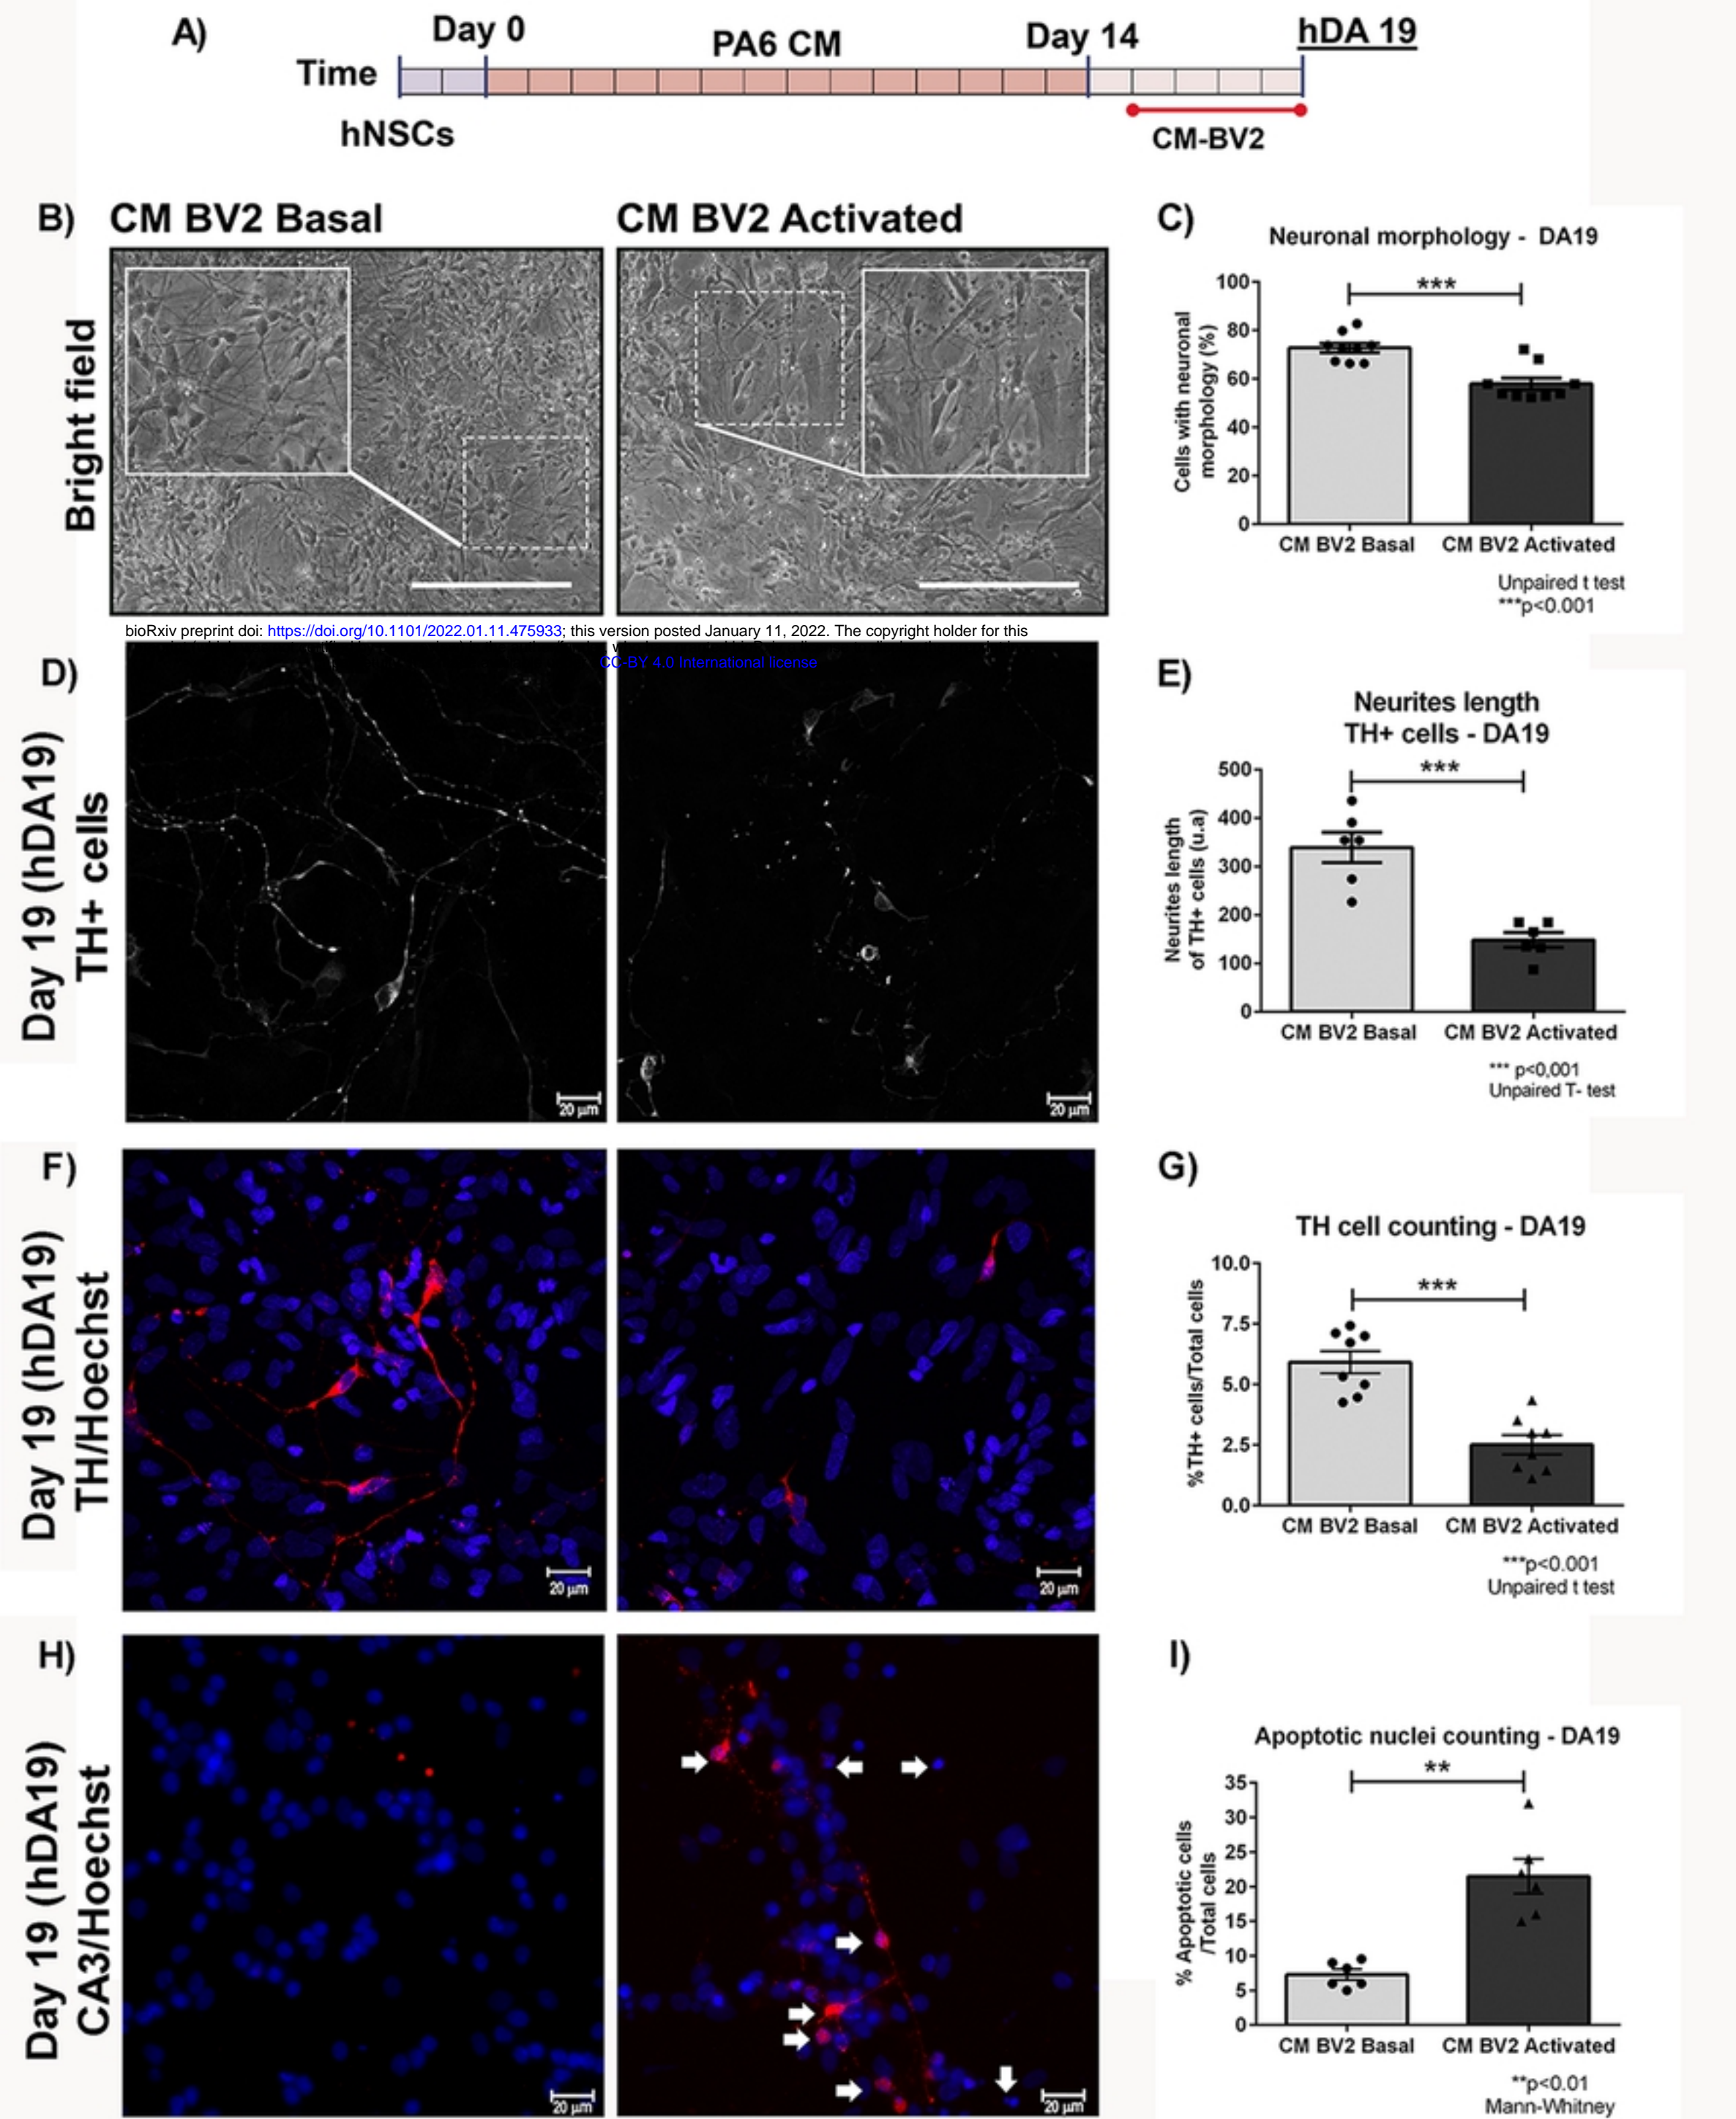

Figure 4

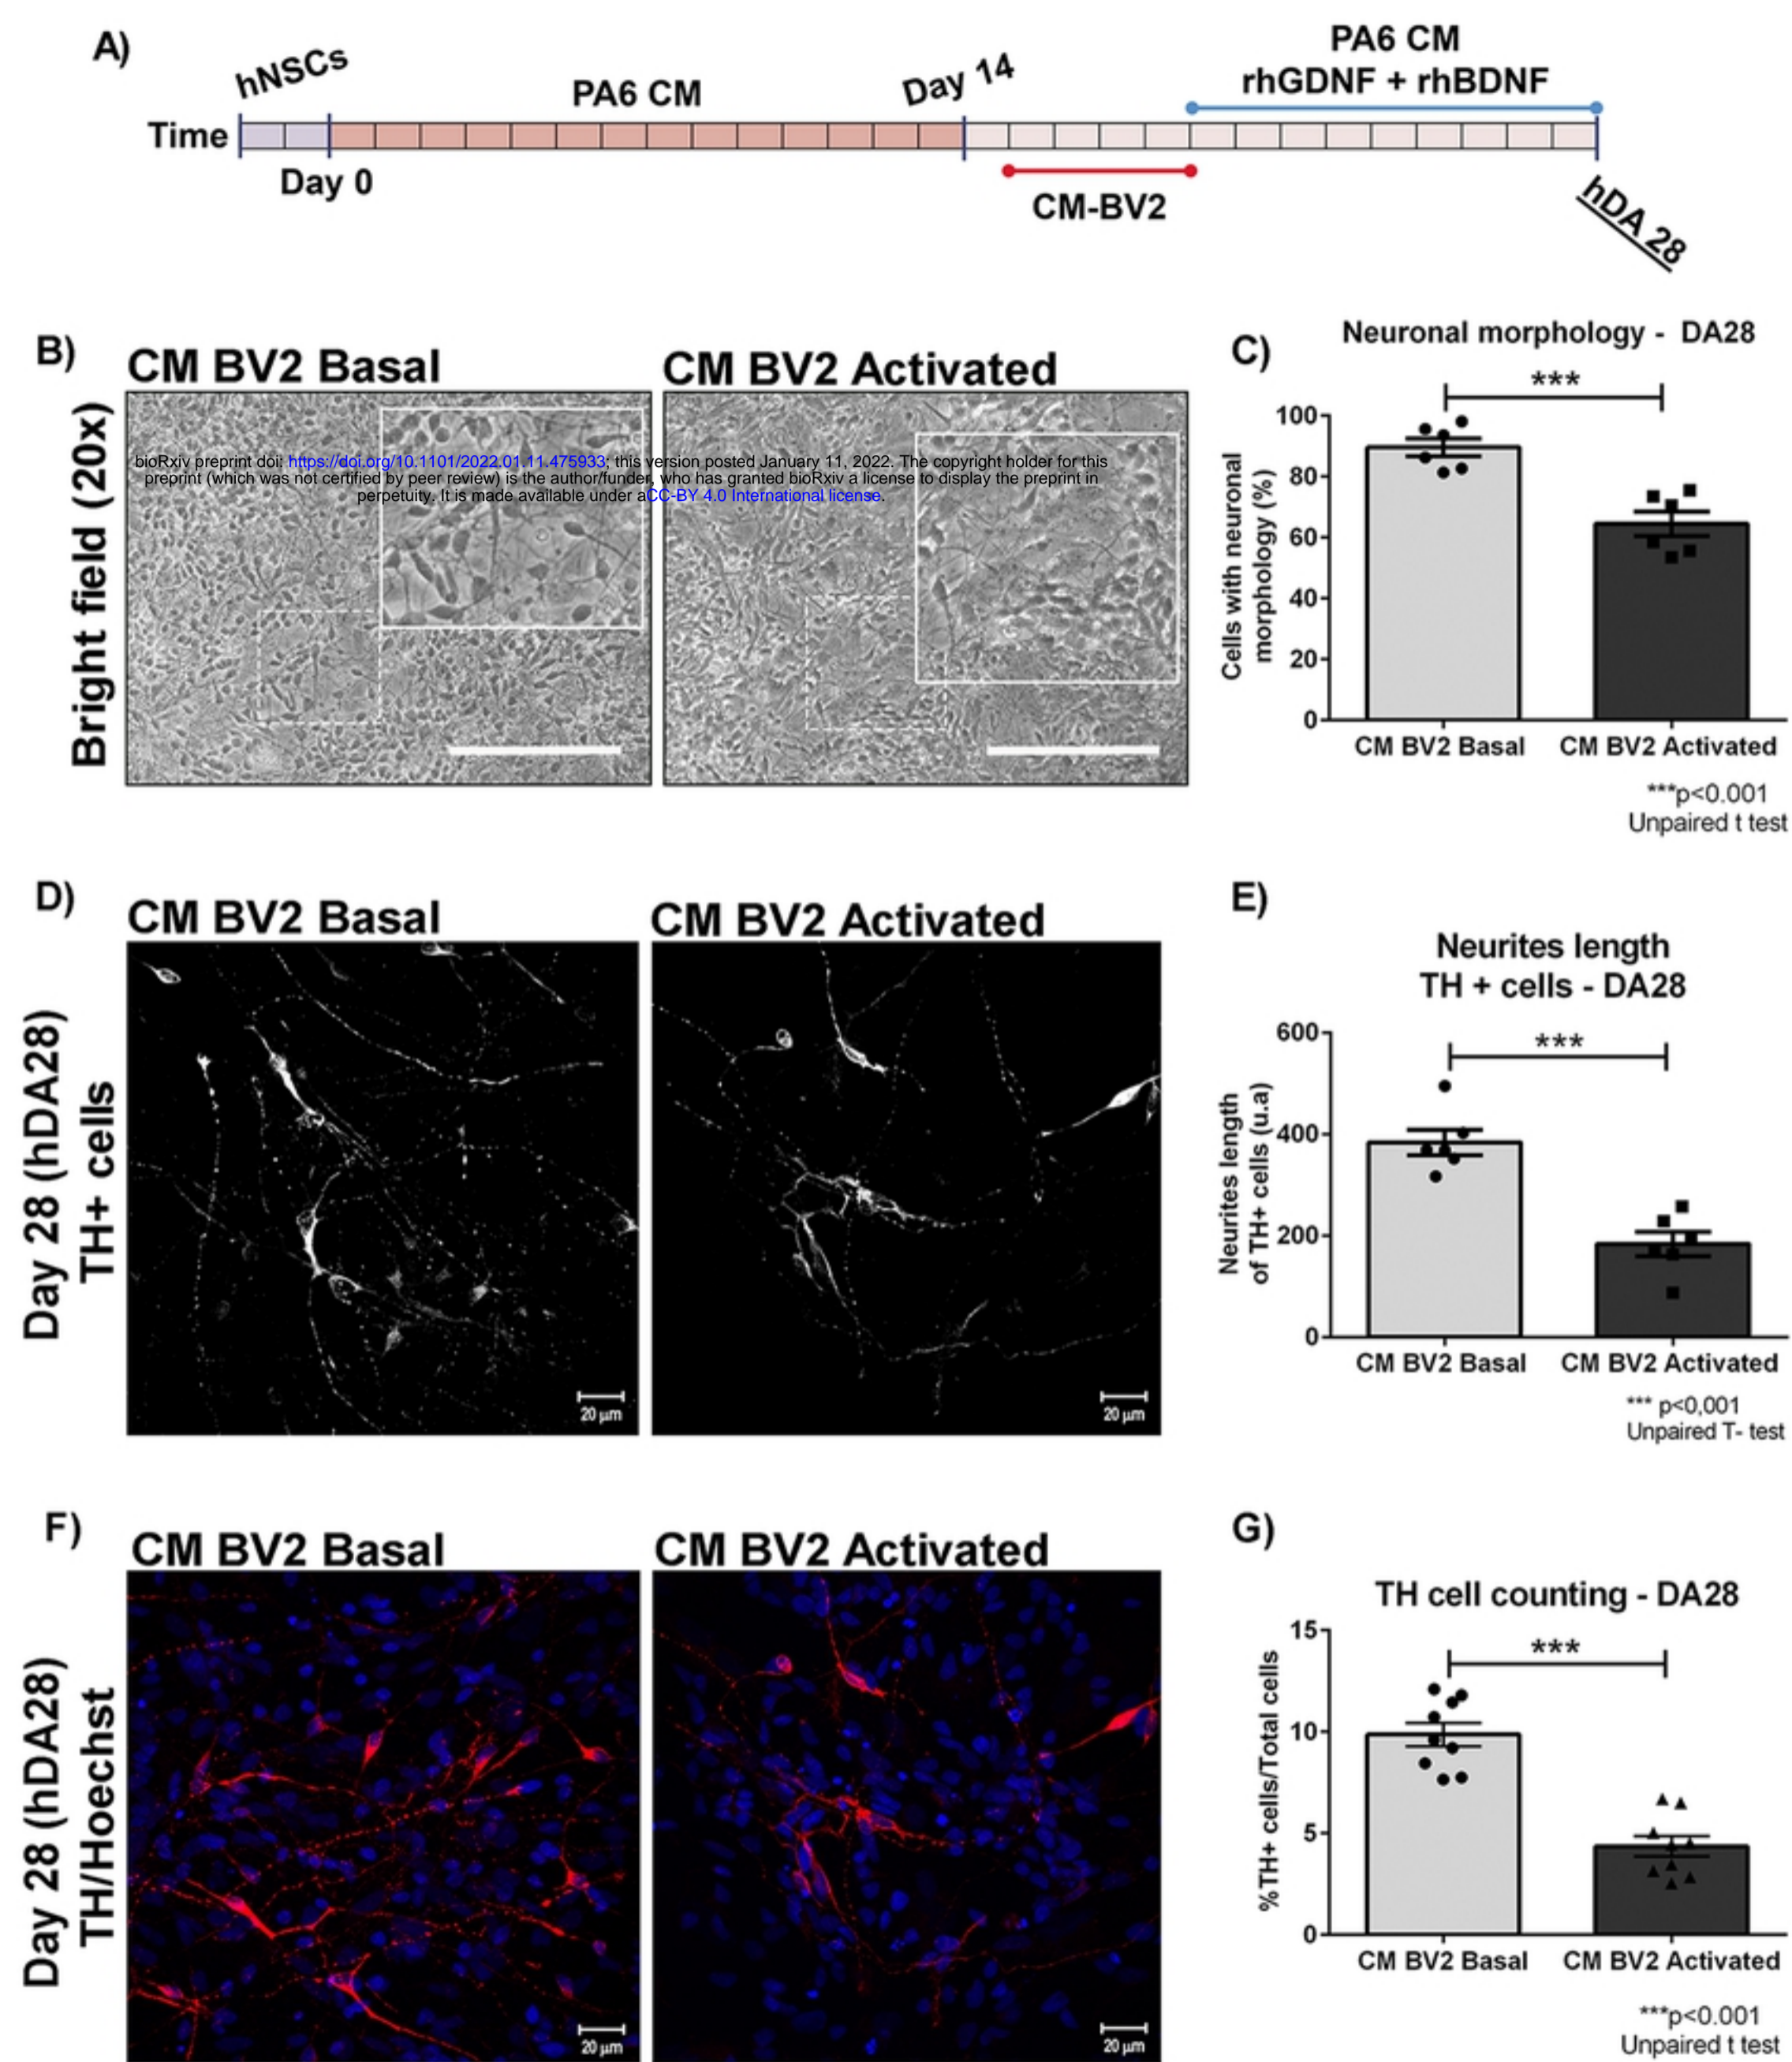

Figure 5

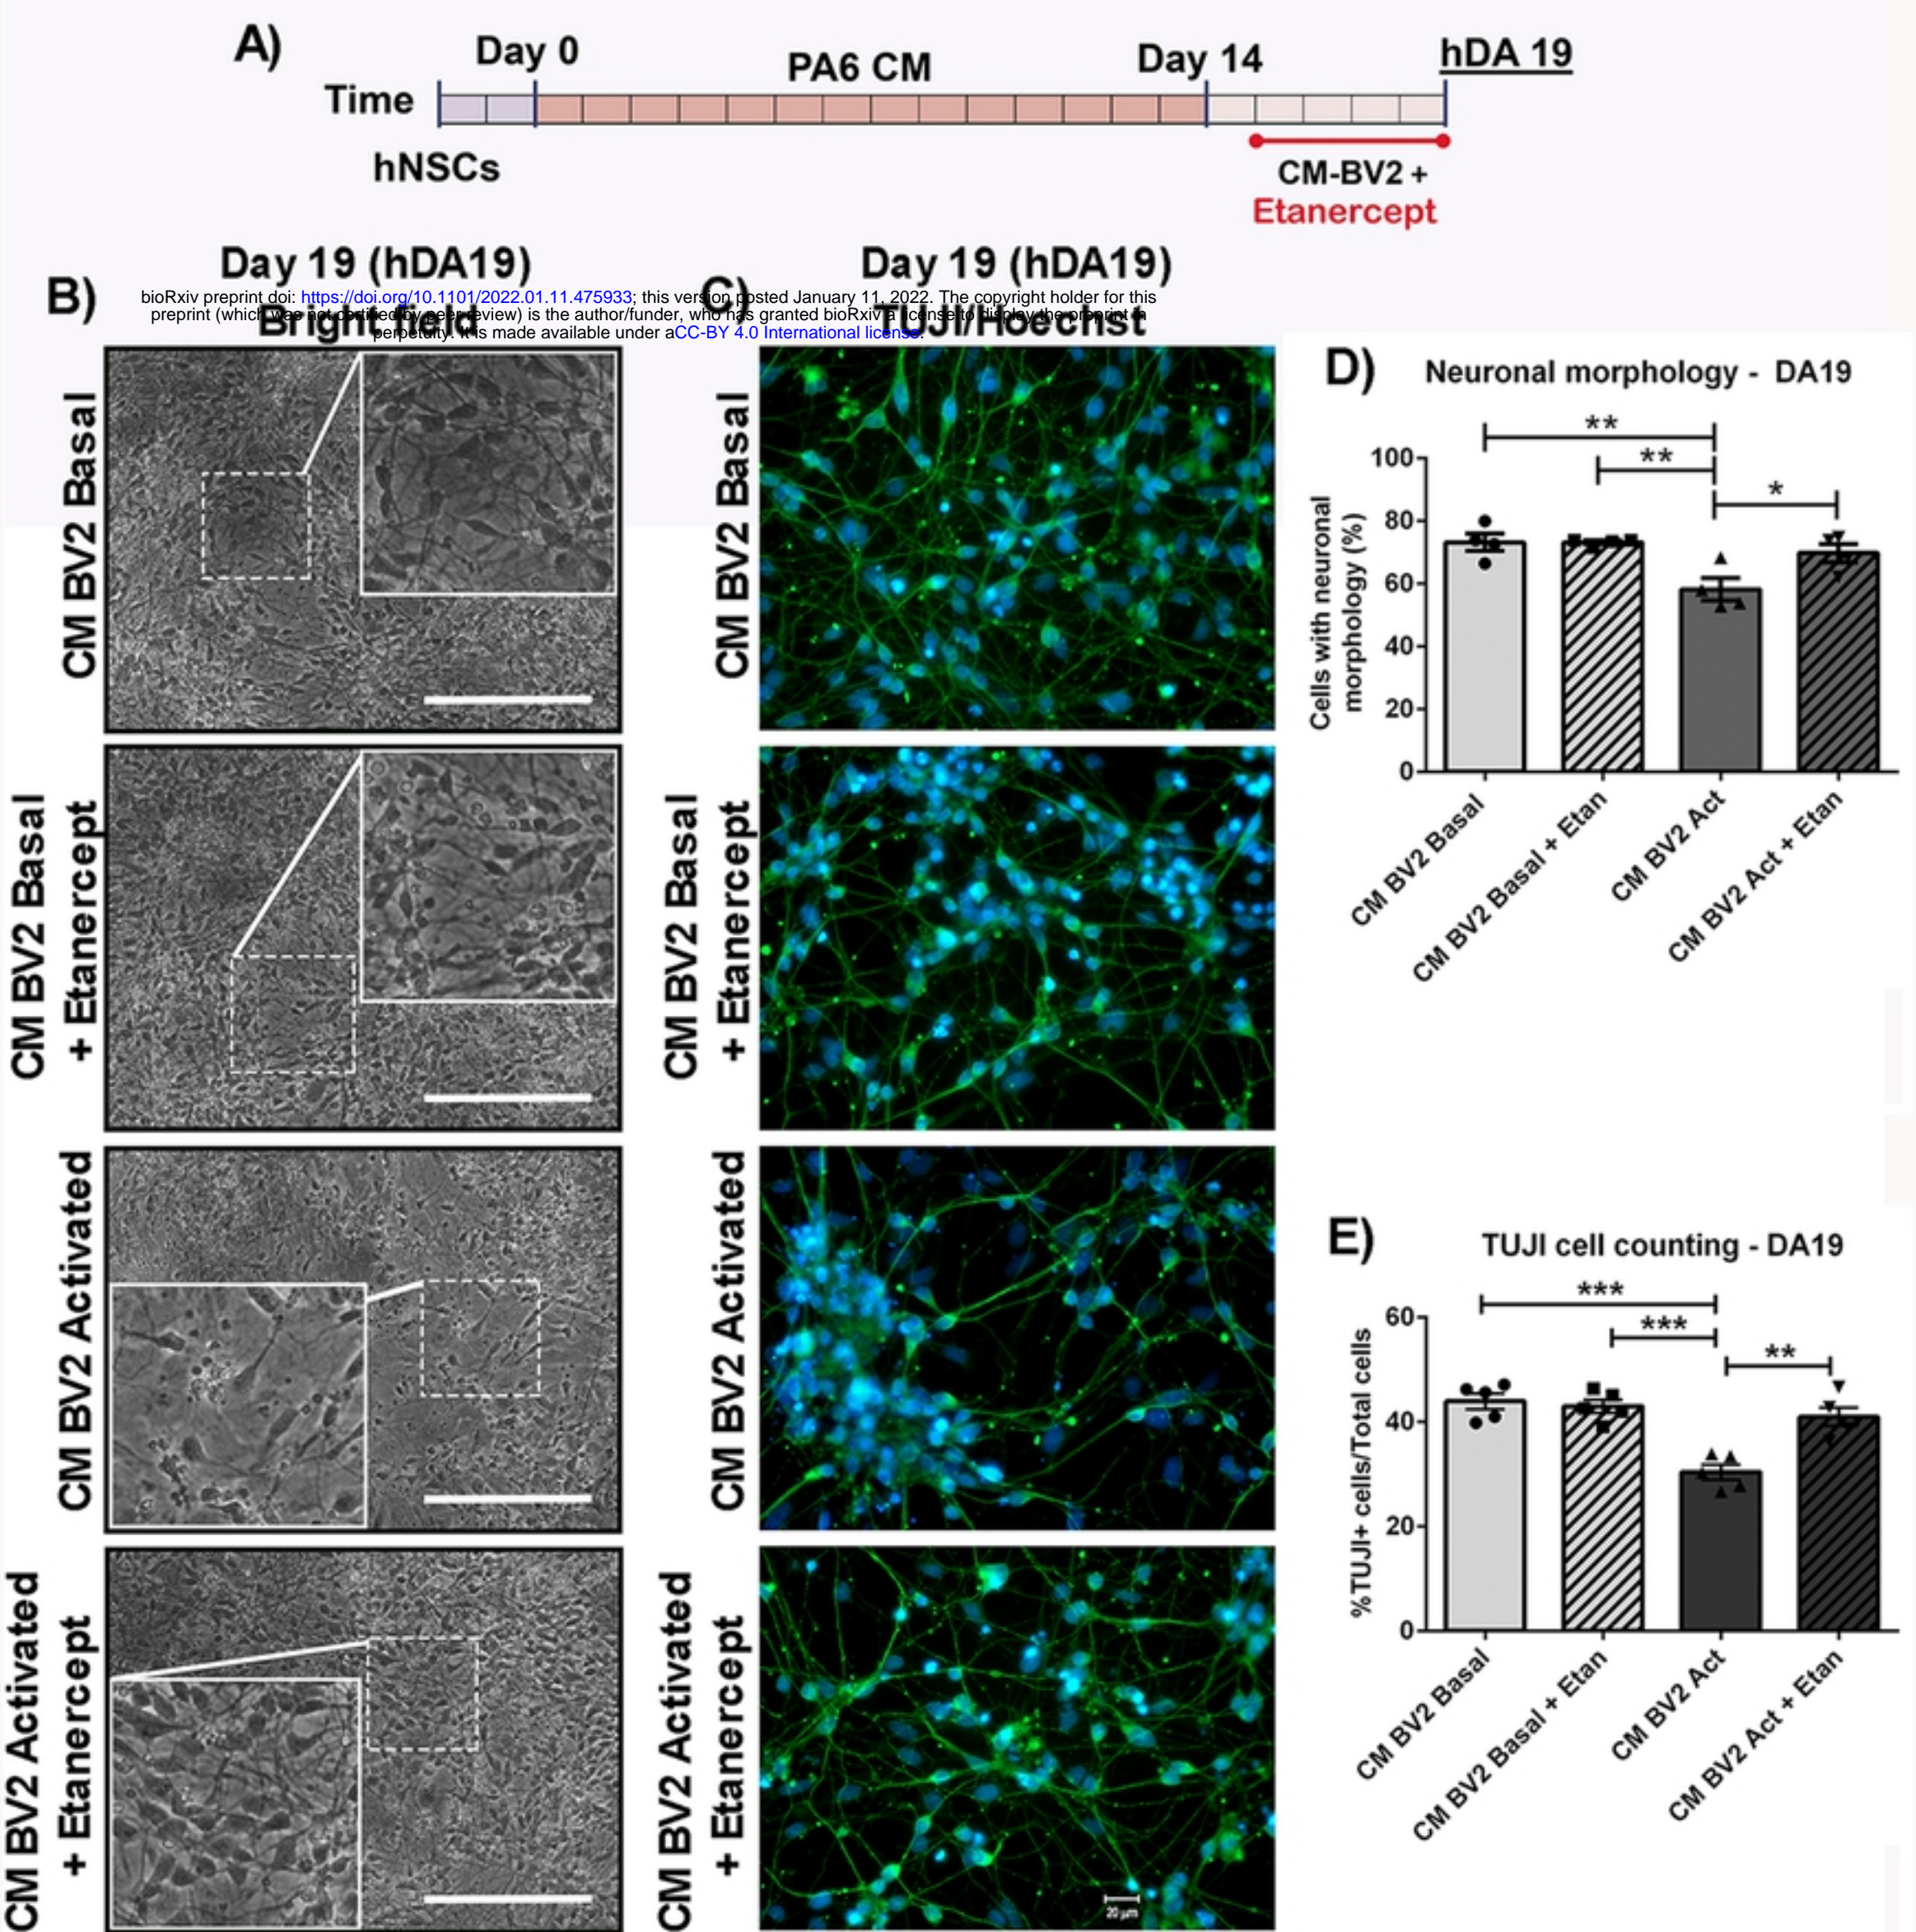

Figure 6

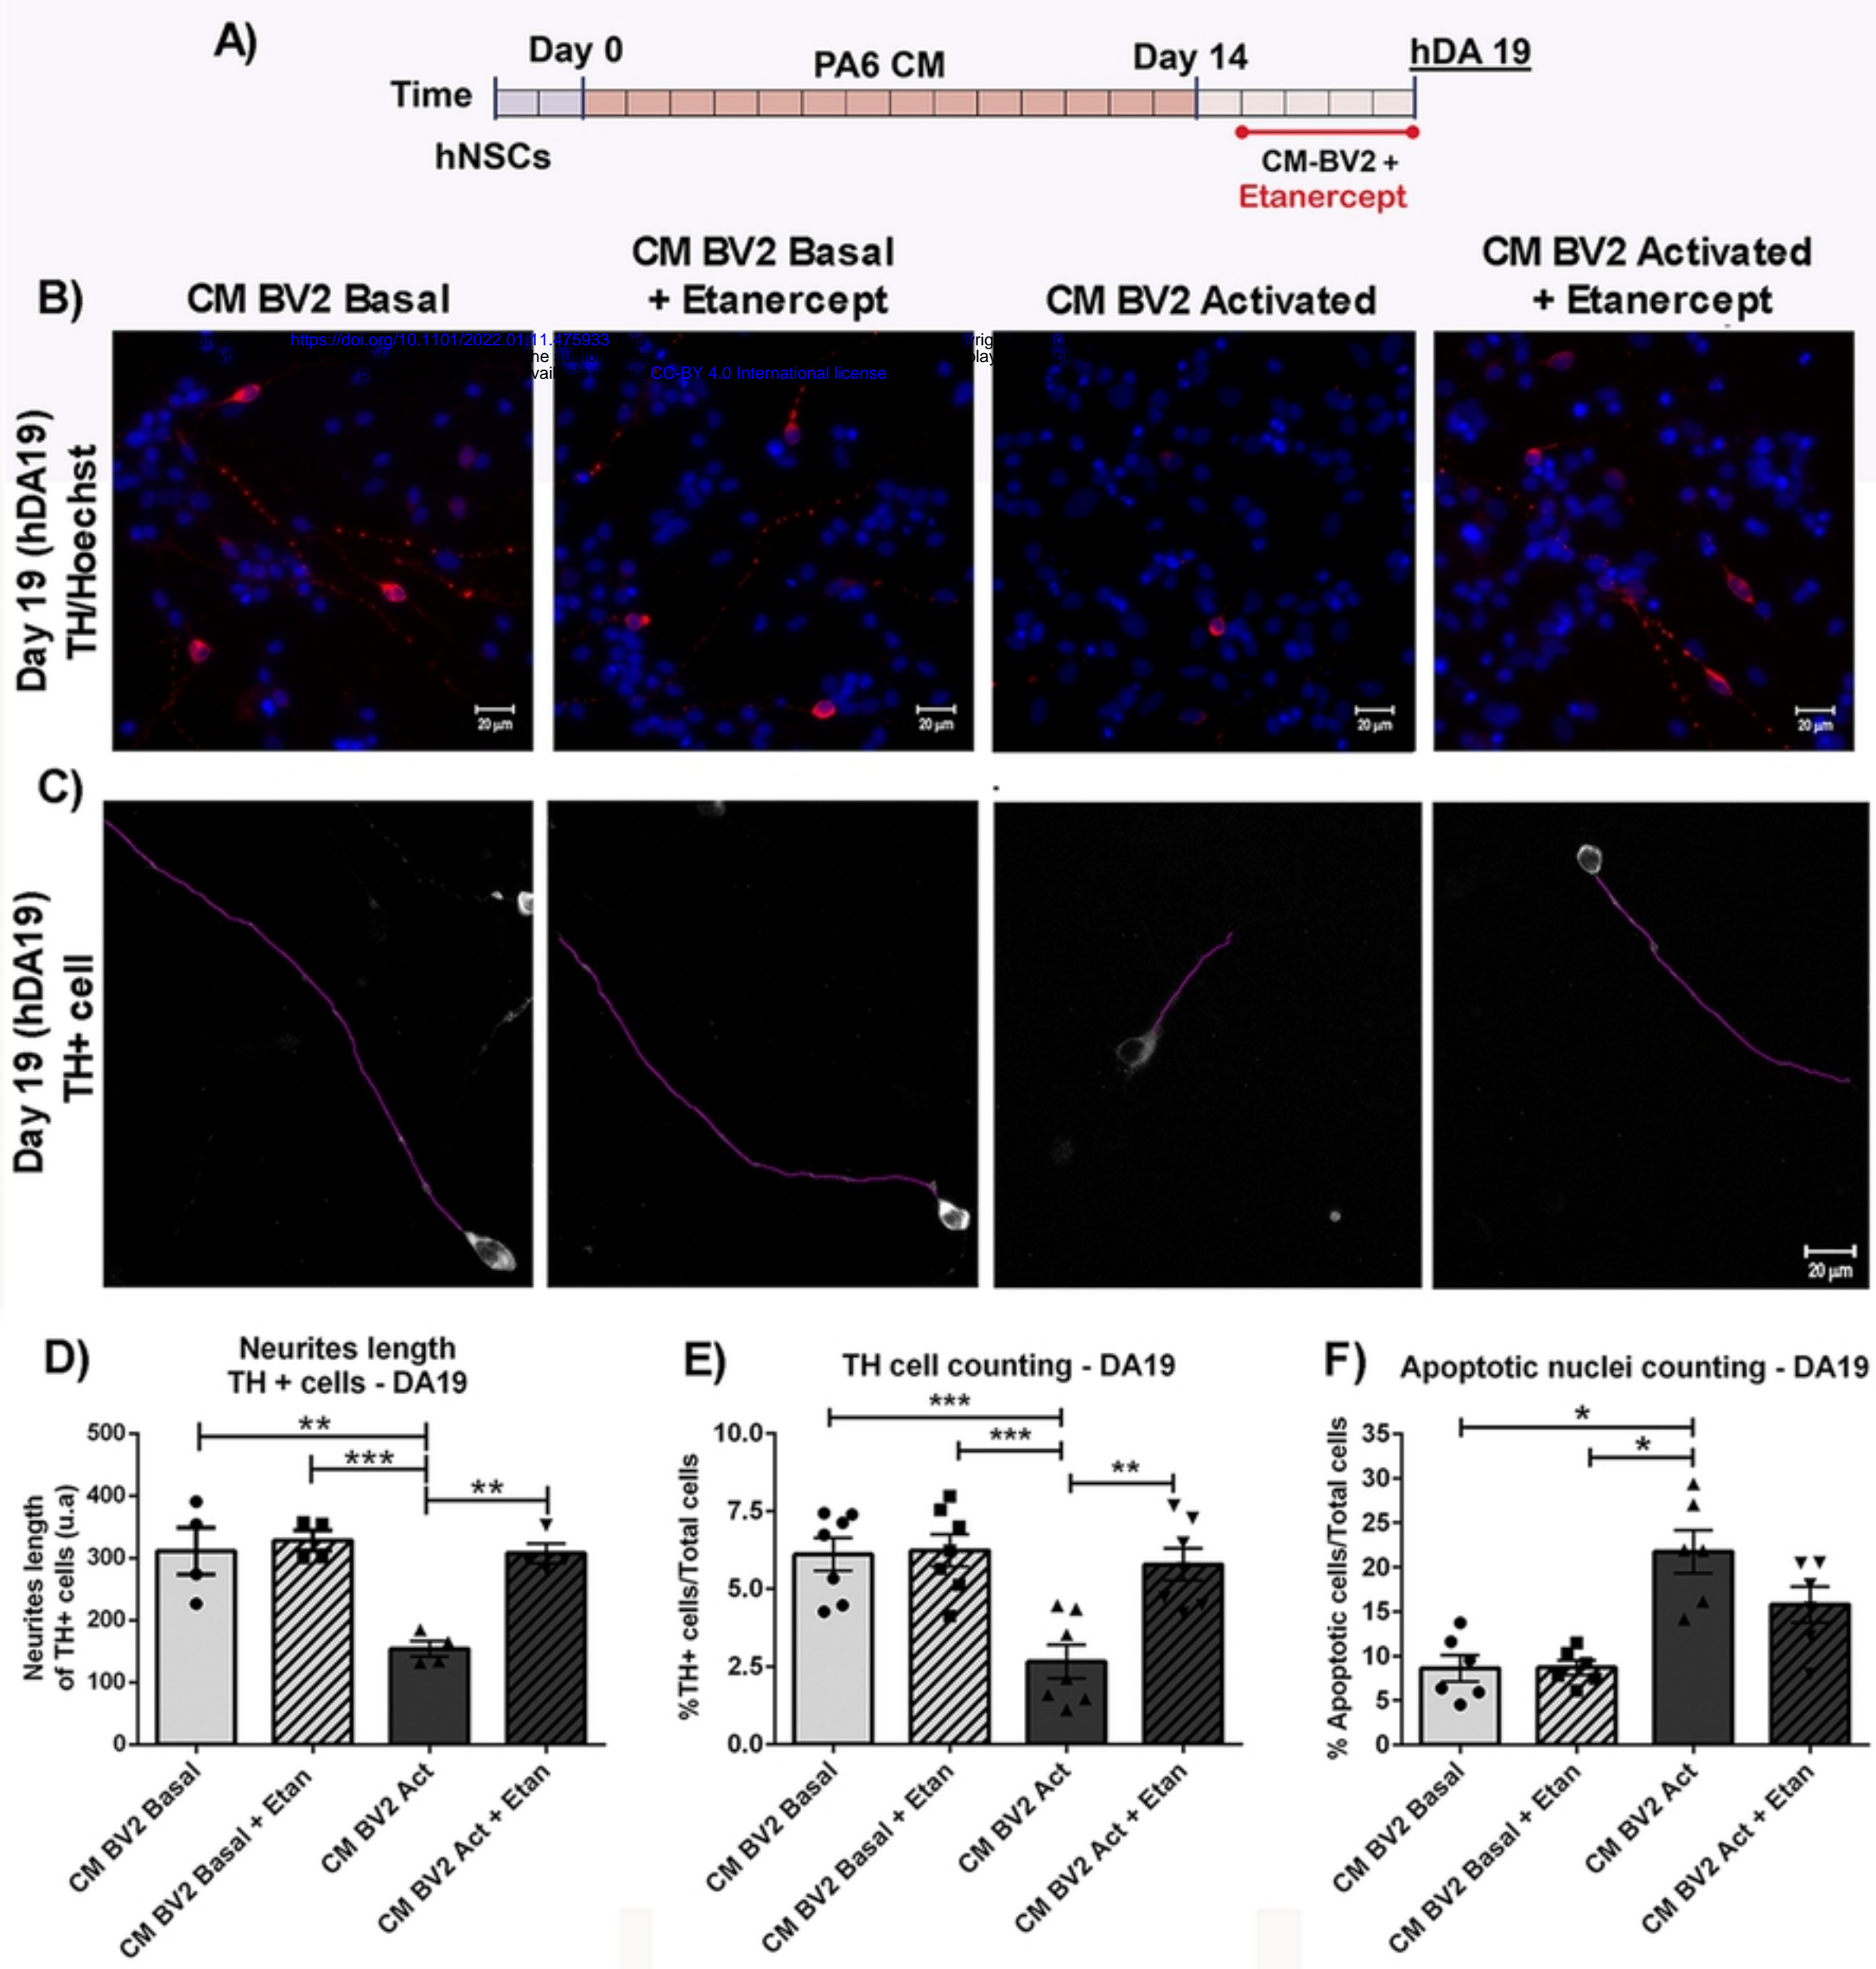

Figure 7

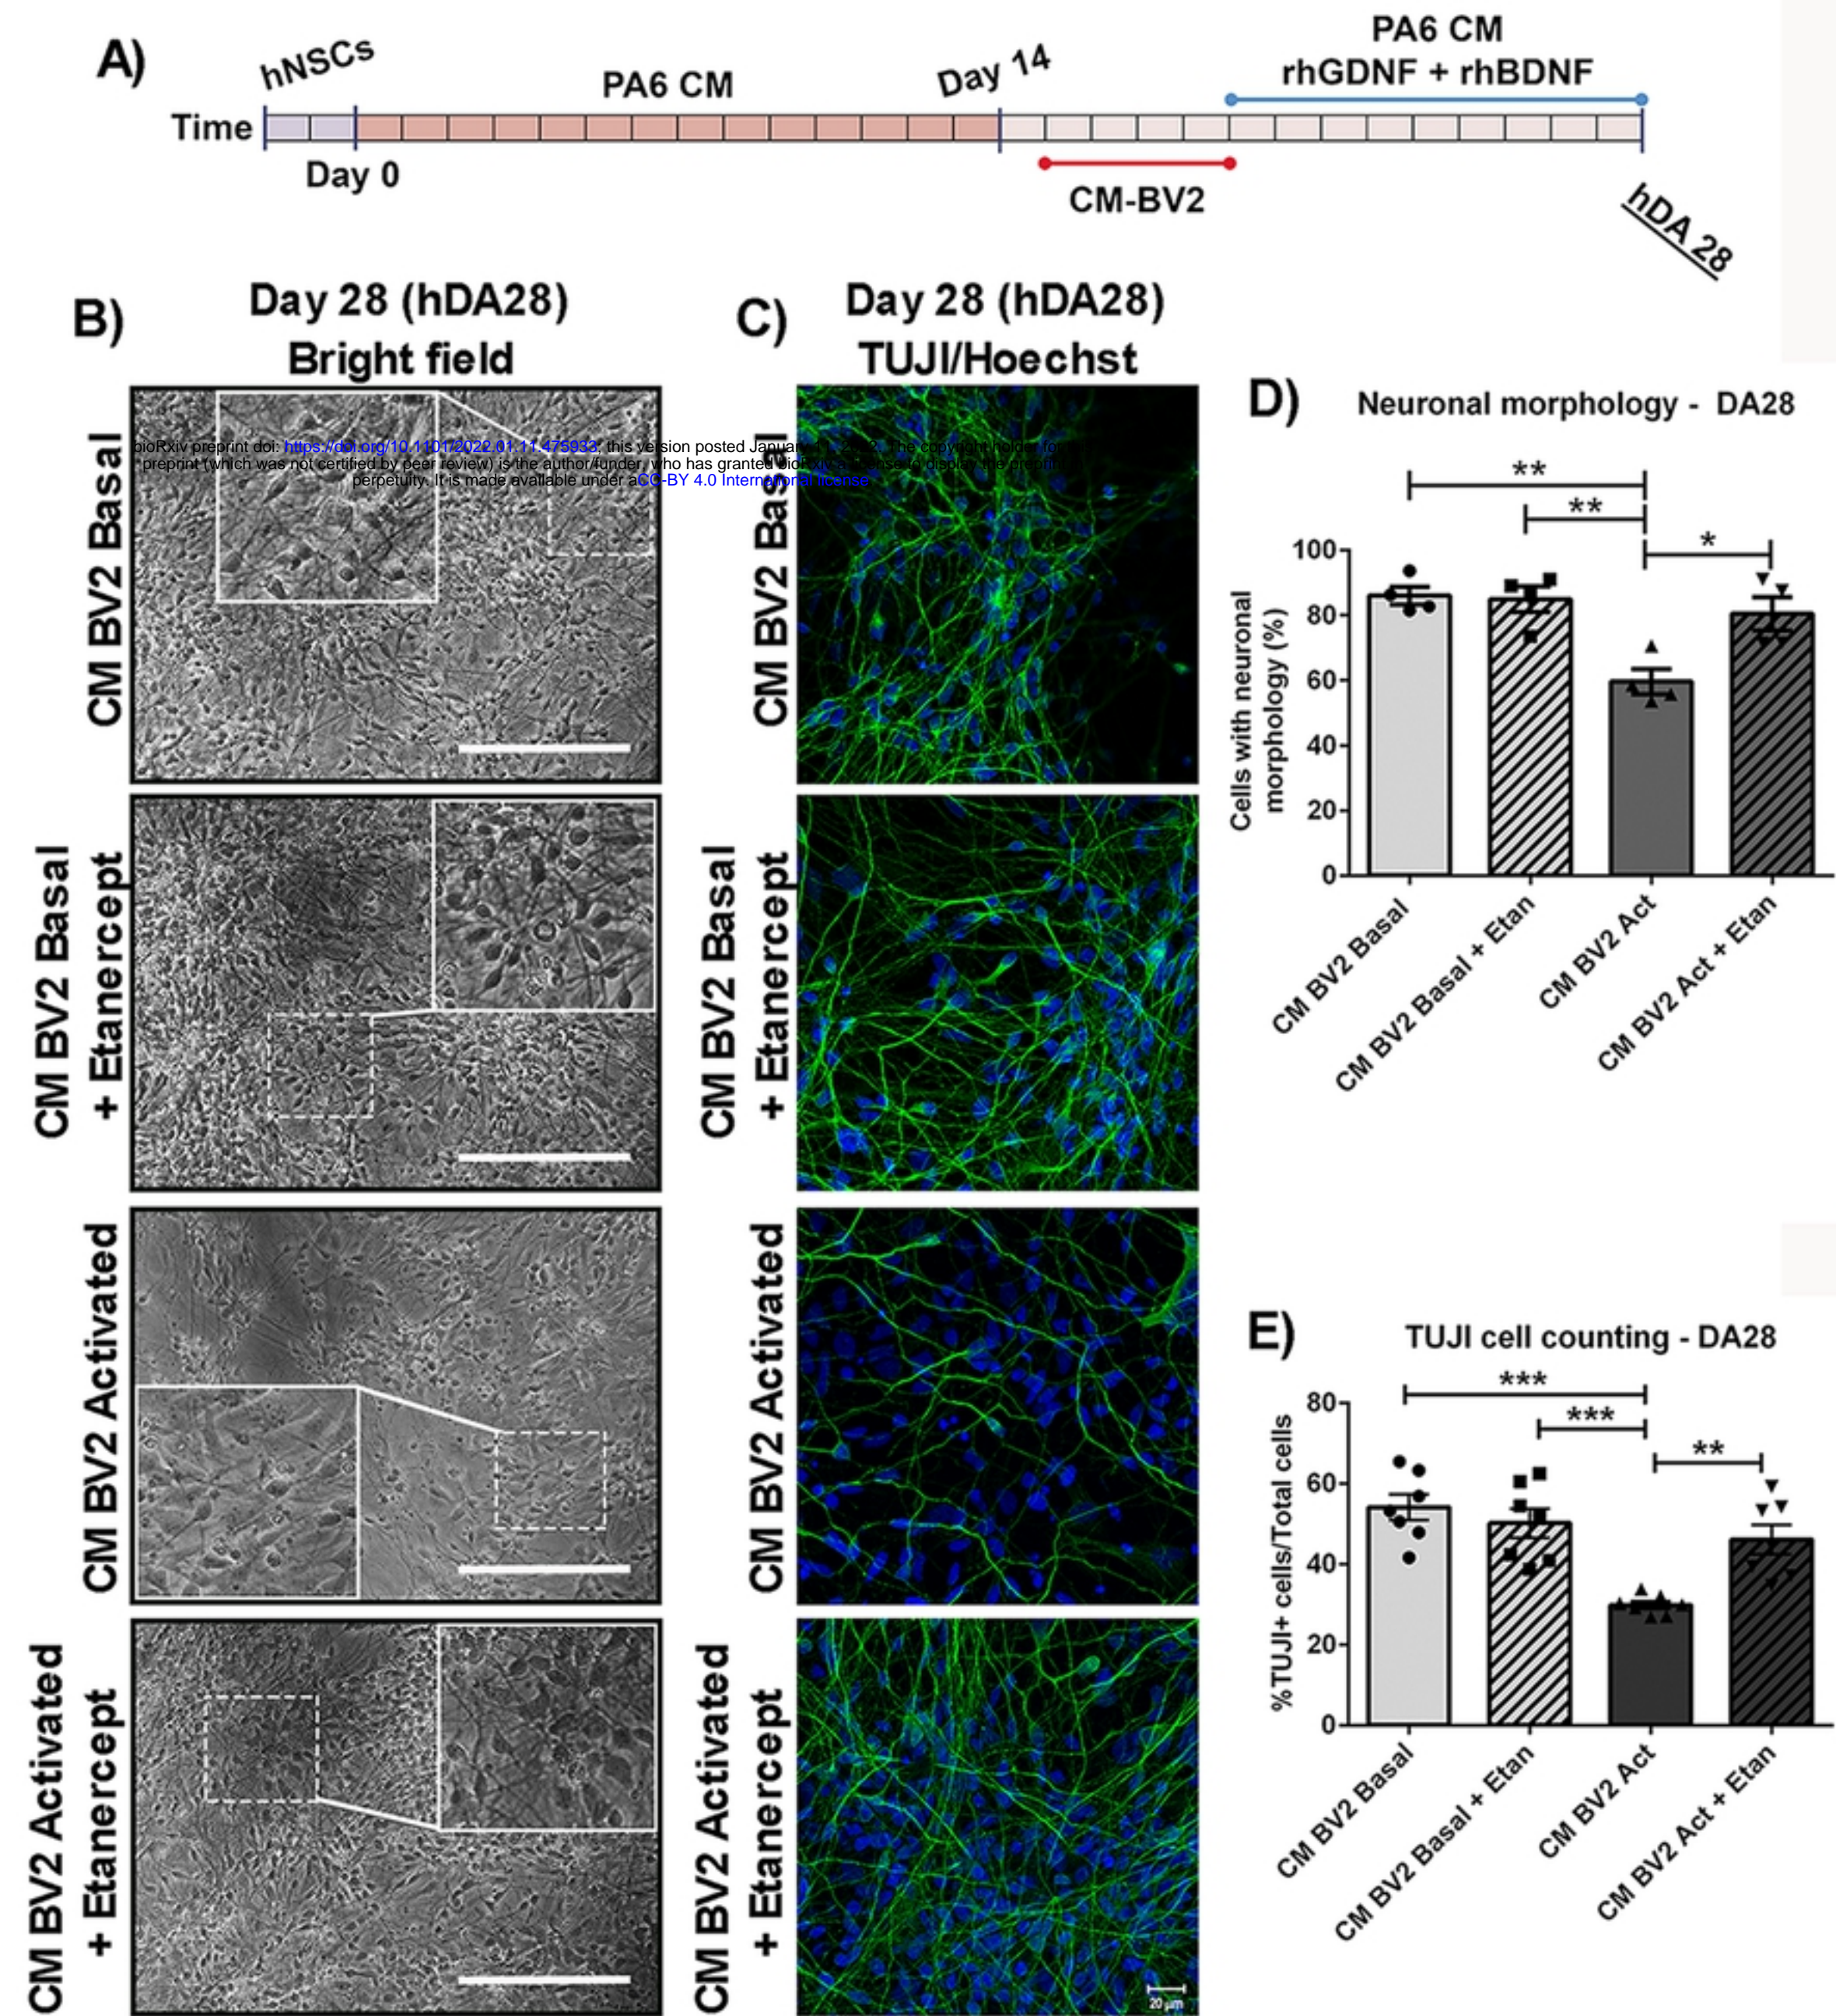

Figure 8

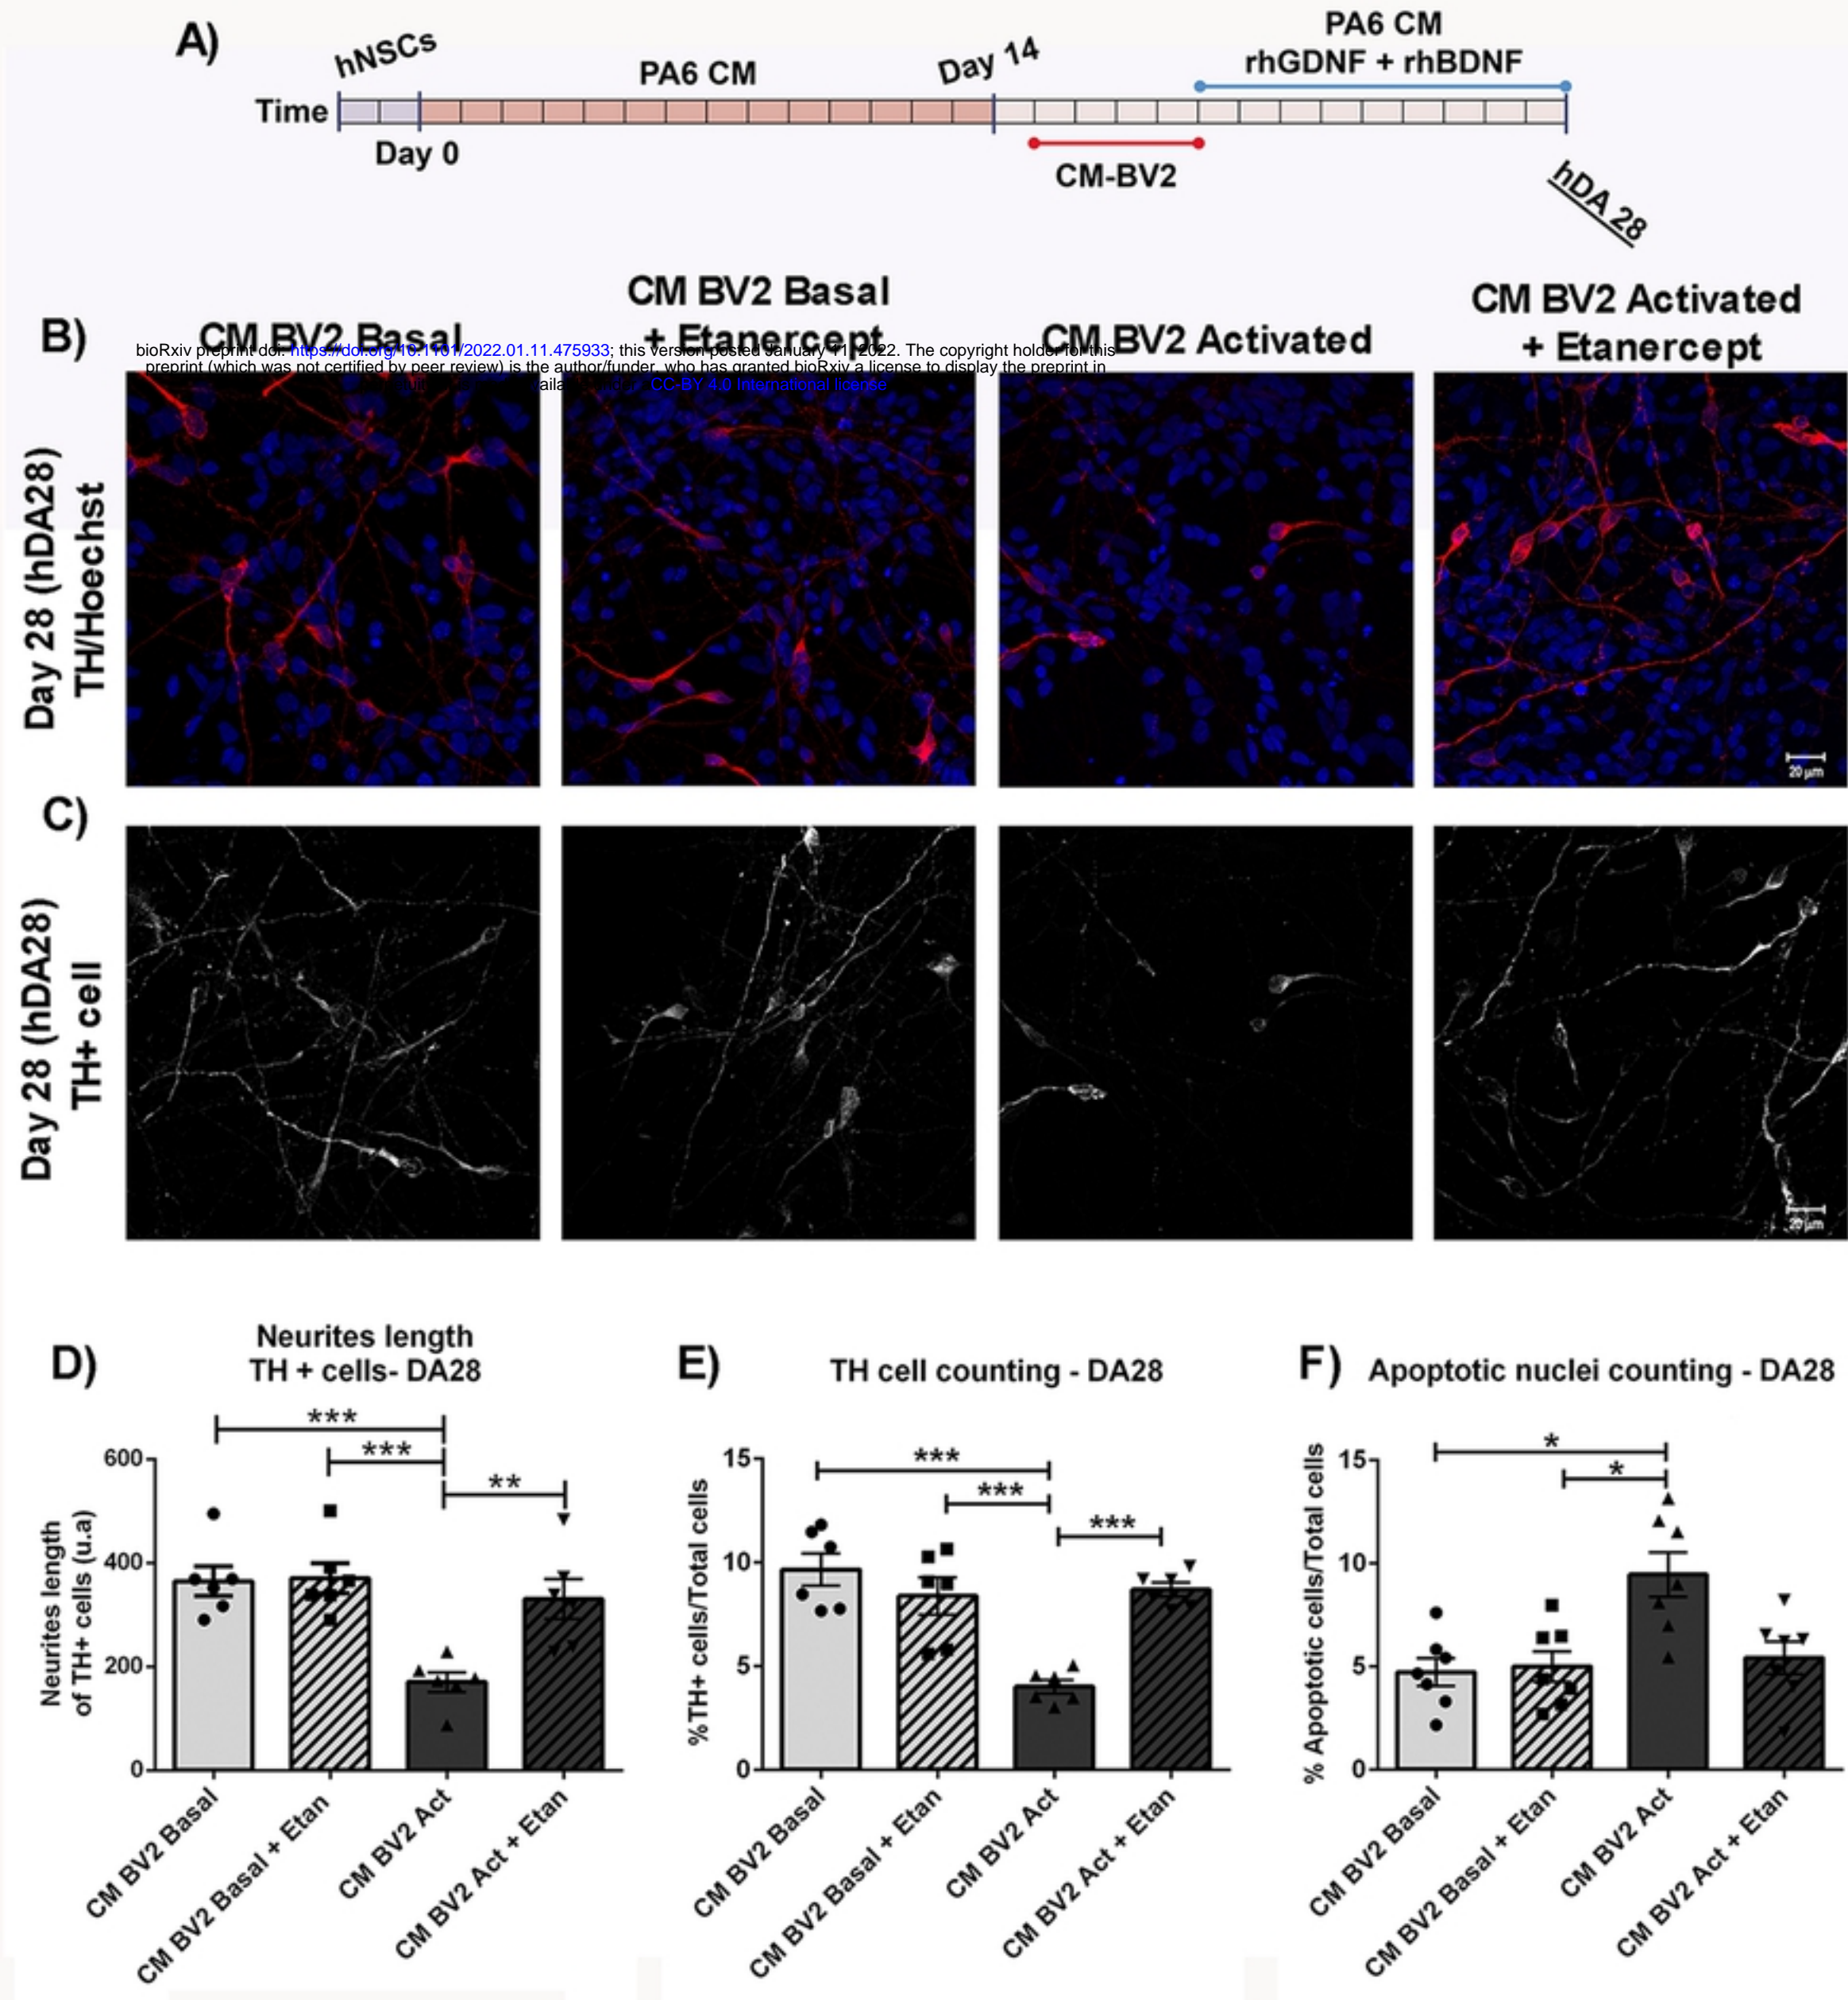

Figure 9
